# 1 **A community-science approach identifies genetic** 2 **variants associated with three color morphs in ball** 3 **pythons (*Python regius*)** 4

5 Autumn R. Brown<sup>1</sup>, Kaylee Comai<sup>1</sup>, Dominic Mannino<sup>1</sup>, Haily McCullough<sup>1</sup>, Yamini Donekal<sup>1</sup>,  
6 Hunter C. Meyers<sup>1</sup>, The BIO306W Consortium<sup>^1</sup>, Chiron W. Graves<sup>1\*</sup>, and Hannah S. Seidel<sup>1\*</sup>

7 <sup>1</sup>Department of Biology, Eastern Michigan University, Ypsilanti, MI, USA

8 \* Corresponding author:

9 E-mail: [hseidel@emich.edu](mailto:hseidel@emich.edu) (HSS), [cgraves6@emich.edu](mailto:cgraves6@emich.edu) (CWG)

10 <sup>^</sup>The BIO306W Consortium comprises students in an undergraduate laboratory course at Eastern  
11 Michigan University. Students are listed in the Acknowledgments.

## 12 **Abstract**

13 Color morphs in ball pythons (*Python regius*) provide a unique and largely untapped  
14 resource for understanding the genetics of coloration in reptiles. Here we use a community-  
15 science approach to investigate the genetics of three color morphs affecting production of the  
16 pigment melanin. These morphs—Albino, Lavender Albino, and Ultramel—show a loss of melanin  
17 in the skin and eyes, ranging from severe (Albino) to moderate (Lavender Albino) to mild  
18 (Ultramel). To identify genetic variants causing each morph, we recruited shed skins of pet ball  
19 pythons via social media, extracted DNA from the skins, and searched for putative loss-of-function  
20 variants in homologs of genes controlling melanin production in other vertebrates. We report that  
21 the Albino morph is associated with missense and non-coding variants in the gene *TYR*. The  
22 Lavender Albino morph is associated with a deletion in the gene *OCA2*. The Ultramel morph is  
23 associated with a missense variant and a putative deletion in the gene *TYRP1*. Our study is one  
24 of the first to identify genetic variants associated with color morphs in ball pythons and shows that  
25 pet samples recruited from the community can provide a resource for genetic studies in this  
26 species.

27 **Data availability:** All relevant data are within the paper and its Supporting Information files. DNA  
28 sequences are available from GenBank, under accession numbers MZ269492-MZ269502.

29 **Funding information:** This work was supported by a Faculty Research Fellowship and James  
30 H. Brickley Award from Eastern Michigan University to HSS and an Undergraduate Research  
31 Stimulus Program Award and a Don Brown and Meta Hellwig Undergraduate Research Award  
32 from Eastern Michigan University to ARB. The funders had no role in study design, data collection  
33 and analysis, decision to publish, or preparation of the manuscript.

34 **Competing interests:** The authors have declared that no competing interests exist.

## 35 Introduction

36 Color patterns are distinctive and beautiful features of many animal species. Among the  
37 many functions of color are to camouflage animals to their surroundings, protect tissues from  
38 ultraviolet radiation, warn predators of poisons, and provide signals for mating and social  
39 communication [1]. Color patterns have also been targeted by artificial selection to create novel  
40 and fanciful color patterns in domestic animals [2].

41 Colors are produced through a combination of chemical pigments and physical structures  
42 (structural colors). Pigments absorb light, whereas structural colors are created when light is  
43 reflected by the nanoscale geometry of a tissue. Common pigments include brown-to-black  
44 melanin, present throughout the animal kingdom, and yellow-to-red carotenoids and pteridines,  
45 common in birds, reptiles, and lower vertebrates [3]. Color-producing structures include ordered  
46 keratin matrices in bird feathers [4], chitin layers in butterfly wings [5], and purine crystals in the  
47 skin of fish, amphibians, and reptiles [6,7]. These color-producing structures can produce a variety  
48 of colors, including iridescent colors, depending on the wavelengths of light they reflect [8].

49 The genetics and development of color patterns in vertebrates have been studied most  
50 extensively in mammals. Mammals largely rely on a single type of pigment (melanin), produced  
51 in the skin by a single type of cell (melanocyte) [9]. This system provides mammals with skin and  
52 hair colors ranging from black to reddish-brown, depending on the chemical structure of the  
53 melanin [10].

54 Skin colors outside mammals are more diverse and include bright colors of all hues. This  
55 increased complexity is produced through a combination of structural colors and melanin and  
56 non-melanin pigment, and it relies on multiple types of specialized color-producing cells in the  
57 skin [11–15]. Color cell development has been characterized to some extent in fish [16–18], and  
58 genes controlling the use of non-melanin pigments have been identified in a few species of fish  
59 and birds [19–25]. The genetics and development of non-mammalian color patterns is less well  
60 understood in other vertebrates, particularly in reptiles [although see 26–29].

61 A unique resource for understanding the genetics of color patterns in reptiles is the ball  
62 python (*P. regius*). Ball pythons are native to sub-Saharan Africa, but have become common as  
63 pets in the United States [30]. Wild ball pythons exhibit a mottled color pattern, consisting of  
64 brown-to-black melanin and red-to-yellow (non-melanin) pigments in the skin (Fig 1). Captive-  
65 bred ball pythons, by contrast, include many variants of the normal color pattern [26,31–33].  
66 These variants, referred to as ‘color morphs’, include animals having reduced melanin (e.g.  
67 Albino), increased melanin (e.g. Cinnamon), reduced red-to-yellow coloration (e.g. Axanthic), or  
68 complex changes in the placement of color patches on the skin (e.g. Spider, Clown, Genetic  
69 Stripe, and Enchi). Many color morphs are heritable and show simple dominant or recessive  
70 patterns of inheritance. These inheritance patterns are consistent with single-gene causality, but  
71 only a single genetic variant associated with a ball python color morph (Piebald) has been  
72 identified to date [26]. Ball pythons therefore represent a tractable yet largely untapped resource  
73 for understanding the genetics of coloration in reptiles. An additional feature of ball pythons  
74 convenient for genetic studies is that DNA samples can be obtained non-invasively from shed  
75 skin [34].

76 The goal of the current study was to perform proof-of-concept experiments to identify the  
77 genetic causes of color morphs in ball pythons, using shed skins of pet ball pythons recruited via  
78 social media. We focused on three morphs for which candidate genes could be readily identified:  
79 Albino, Lavender Albino, and Ultramel. These morphs show a loss of brown-to-black coloration in  
80 the skin and eyes, characteristic of a defect in melanin production (Fig 1). These morphs are  
81 recessive and non-allelic (i.e. crosses between these morphs yield offspring with normal  
82 coloration). Their loss of melanin ranges from severe (Albino) to moderate (Lavender Albino) to  
83 mild (Ultramel). This range of phenotypes mirrors the range of phenotypes observed for loss-of-  
84 function variants in genes required for melanin production in other vertebrates (Table 1). This

85 similarity provided a list of candidate genes that we predicted might harbor loss-of-function  
86 variants causing the Albino, Lavender Albino, and Ultramel color morphs in ball pythons. Our  
87 study demonstrates the feasibility of using community-sourced samples for genetic studies in ball  
88 pythons and lays the groundwork for future investigations of reptile-specific color patterns in this  
89 species.

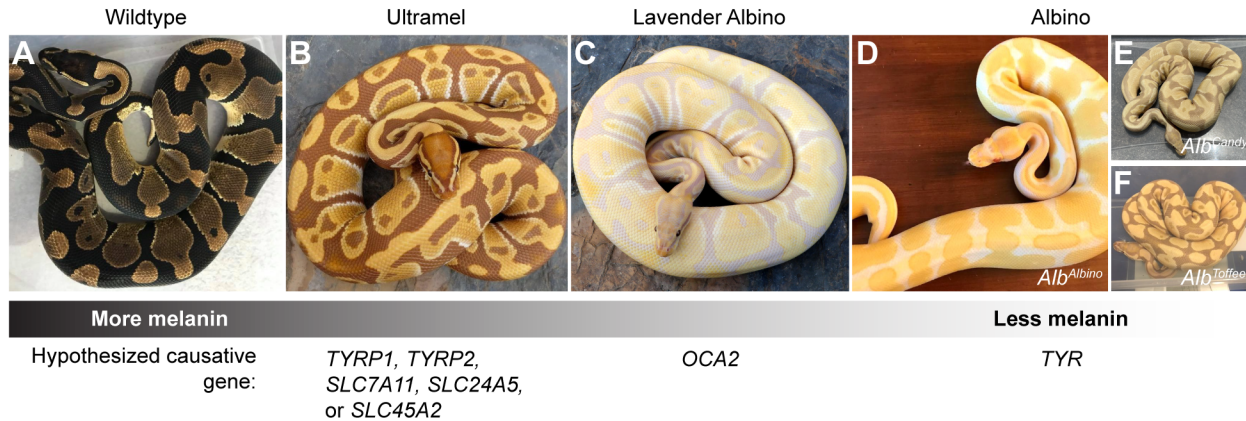

90 **Fig 1. The Albino, Lavender Albino, and Ultramel color morphs have reduced brown-to-**  
91 **black coloration, characteristic of a loss of melanin.** Red-to-yellow coloration is unaffected in  
92 these morphs. Hypothesized causative genes represent genes in which loss-of-function variants  
93 in other vertebrates produce similar phenotypes (Table 1). (A) Wildtype. (B) Ultramel. (C)  
94 Lavender Albino. (D-F) Albino. (D) Albino animal described as an *Alb<sup>Albino</sup>* homozygote. (E) Albino  
95 animal described as an *Alb<sup>Candy</sup>* homozygote. (F) Albino animal described as an *Alb<sup>Toffee</sup>*  
96 homozygote. Photo credits, Ryan Young of Molecular Reptile, Chiron Graves, Phil Barclay,  
97 Michael Freedman of The Florida Reptile Ranch.

98 **Table 1. Loss-of-function phenotypes of melanogenesis genes across vertebrates.**

| Gene    | Species with identified loss-of-function variants |                                                                                                                                                           | Role of protein                                   | Loss-of-function phenotype |
|---------|---------------------------------------------------|-----------------------------------------------------------------------------------------------------------------------------------------------------------|---------------------------------------------------|----------------------------|
| TYR     | Fish                                              | Japanese carp [35], Japanese rice fish [36]                                                                                                               | Rate-limiting enzyme in melanin synthesis pathway | Severe loss of melanin     |
|         | Frogs and snakes                                  | Japanese wild frogs (three species) [37], Japanese rat snake [38]                                                                                         |                                                   |                            |
|         | Birds                                             | Chicken [39–41]                                                                                                                                           |                                                   |                            |
|         | Ungulates                                         | Water buffalo [42], Cattle [43], Red deer [44], Asinara donkey [45]                                                                                       |                                                   |                            |
|         | Rodents                                           | House mouse [46], Wistar rat [47], Domestic guinea pig [48]                                                                                               |                                                   |                            |
|         | Primates                                          | Crab-eating macaque [49], Capuchin monkey [50], Hamadryas baboon [51], Human [reviewed in 52]                                                             |                                                   |                            |
|         | Other mammals                                     | Humpback whale [53], Ferret [54], American mink [55], Domestic cat [56–58], Silver fox [59]                                                               |                                                   |                            |
| OCA2    | Fish                                              | Mexican cavefish [60], Lake Malawi cichlid [61]                                                                                                           | Cl <sup>-</sup> channel regulating melanosome pH  | Moderate loss of melanin   |
|         | Snakes                                            | Corn snake [62]                                                                                                                                           |                                                   |                            |
|         | Mammals                                           | Domestic dog [63], Bama miniature pig [64], House mouse [65], Human [reviewed in 52]                                                                      |                                                   |                            |
| TYRP1   | Fish                                              | Zebrafish [66]                                                                                                                                            | Enzymes contributing to melanin synthesis         | Mild loss of melanin       |
|         | Birds                                             | Saker falcon [67]                                                                                                                                         |                                                   |                            |
|         | Mammals                                           | Chinese indigenous pig [68], Liangshan pig [69], Domestic cat [58,70], Soay sheep [71], Valais Red sheep [72], American mink [73], Human [reviewed in 52] |                                                   |                            |
| TYRP2   | Mammals                                           | House mouse [74,75]                                                                                                                                       | Solute transporters                               |                            |
| SLC7A11 | Mammals                                           | House mouse [76]                                                                                                                                          |                                                   |                            |
| SLC24A5 | Fish                                              | Zebrafish [77]                                                                                                                                            |                                                   |                            |
|         | Mammals                                           | Domestic dog [78], Horse [79], Human [reviewed in 52]                                                                                                     |                                                   |                            |
| SLC45A2 | Fish                                              | Japanese rice fish [80]                                                                                                                                   | Solute transporters                               |                            |
|         | Birds                                             | Chicken and Japanese quail [81]                                                                                                                           |                                                   |                            |
|         | Mammals                                           | Horse [82], House mouse [83], Bengal tiger [84], Western lowland gorilla [85], Human [reviewed in 52]                                                     |                                                   |                            |

99

## 100 Results

### 101 Obtaining a reference sequence for melanogenesis genes in a 102 wildtype ball python

103 Genes required for melanin production have been identified in humans and other  
104 vertebrates (Table 1). These genes encode enzymes that synthesize melanin (*TYR*, *TYRP1*,  
105 *TYRP2*) [86], a chloride channel required for maintaining the pH of melanosomes (*OCA2*) [87],  
106 and transporters thought to import solutes into the cell or into organelles (*SLC7A11*, *SLC24A5*,  
107 and *SLC45A2*) [76,88,89]. These genes are highly conserved among vertebrates and occur in  
108 single copy in most vertebrate genomes. Loss-of-function variants in these genes in humans  
109 cause a genetic disorder known as oculocutaneous albinism, which is characterized by loss of  
110 melanin in the skin, hair, and eyes [52]. This loss of melanin ranges from severe to mild,  
111 depending on the causative gene and exact genetics variants therein [52]. Similar phenotypes  
112 occur in other animals, where the loss of melanin extends to feathers and scales (Table 1).

113 To obtain a reference sequence for melanogenesis genes in ball python, we amplified and  
114 sequenced the coding regions of *TYR*, *TYRP1*, *TYRP2*, *OCA2*, *SLC7A11*, *SLC24A5*, and  
115 *SLC45A2* from a single ball python having normal coloration (henceforth 'wildtype'). Primers for  
116 amplification were designed against the genome of Burmese python (*Python bivittatus*), the  
117 closest relative of ball python for which genome sequence was available [90]. Comparison of ball  
118 python sequences to sequences from Burmese python revealed 97.2-99.2% nucleotide identity  
119 within coding regions and 96.9-98.5% nucleotide identity within flanking non-coding regions  
120 (Table 2). This analysis provided a reference sequence for genes in ball python that might harbor  
121 loss-of-function variants causing the Albino, Lavender Albino, and Ultramel color morphs.

122 **Table 2. Comparison of ball python and Burmese python genomic and protein sequences**  
123 **for melanogenesis genes.**

| Region     | Gene           | Total nucleotide sequence aligned (bp) | Nucleotide identity (%) | Amino acid identity (%) |
|------------|----------------|----------------------------------------|-------------------------|-------------------------|
| Coding     | <i>TYR</i>     | 1,591                                  | 98.5                    | 99.6                    |
|            | <i>TYRP1</i>   | 1,584                                  | 99.2                    | 99.6                    |
|            | <i>TYRP2</i>   | 1,473                                  | 98.3                    | 99.1                    |
|            | <i>OCA2</i>    | 2,577                                  | 98.9                    | 99.7                    |
|            | <i>SLC7A11</i> | 1,506                                  | 98.7                    | 99.7                    |
|            | <i>SLC24A5</i> | 1,379                                  | 98.2                    | 99.5                    |
|            | <i>SLC45A2</i> | 1,557                                  | 97.2                    | 98.9                    |
| Non-coding | <i>TYR</i>     | 577                                    | 96.9                    | (not applicable)        |
|            | <i>TYRP1</i>   | 1,160                                  | 97.0                    |                         |
|            | <i>TYRP2</i>   | 1,060                                  | 97.9                    |                         |
|            | <i>OCA2</i>    | 2,154                                  | 98.5                    |                         |
|            | <i>SLC7A11</i> | 3,407                                  | 97.9                    |                         |
|            | <i>SLC24A5</i> | 1,335                                  | 97.9                    |                         |
|            | <i>SLC45A2</i> | 999                                    | 97.0                    |                         |

124

## 125 **The Albino color morph is associated with three haplotypes of** 126 ***TYR***

127 The Albino color morph in ball pythons is characterized by an absence or near absence  
128 of melanin in the skin and eyes. This phenotype resembles the phenotype caused by loss of  
129 function of *TYR* in other vertebrates. *TYR* encodes the enzyme catalyzing the rate-limiting step  
130 of melanin production [86]. Loss of this enzymatic activity in other vertebrates causes a severe  
131 loss of melanin, which is typically more severe than the loss of melanin caused by loss of function  
132 of other melanogenesis genes (Table 1). We therefore hypothesized that the Albino color morph  
133 in ball pythons was caused by loss-of-function variants in *TYR*.

134 To test whether the Albino color morph was associated with variants in *TYR*, we performed  
135 a small-scale association study using 50 Albinos and 56 Non-Albinos, recruited from a total of 18  
136 states in the United States. Polymorphic sites were identified through pilot sequencing of a subset  
137 of animals (see Methods). Six polymorphic sites were selected for the association study, two near  
138 the 5' end of *TYR* and four near the 3' end (Fig 2A). Each animal was genotyped at each site, and  
139 haplotypes were reconstructed using PHASE [91,92]. Association between haplotype and color  
140 morph was tested using the case-control test of PHASE. As a negative control, we also tested for  
141 association between haplotype and color morph at *TYRP1*, *TYRP2*, and *OCA2*, using two  
142 polymorphic sites per gene (S1 Table). This analysis revealed a significant association between  
143 haplotype and color morph at *TYR* ( $p = 0.04$ , Bonferroni corrected), but no association for the  
144 other three genes ( $p > 0.05$ , Bonferroni corrected). The association for *TYR* was driven by two  
145 features of the haplotype distribution: (i) diversity of *TYR* haplotypes was reduced among Albinos  
146 compared to Non-Albinos (Fig 2A), and (ii) two of the three *TYR* haplotypes found in Albinos were  
147 rare among Non-Albinos (Fig 2A). These results demonstrate an association between the Albino  
148 color morph and variants in *TYR*; they further show that all Albino animals were homozygous or  
149 compound heterozygous for any of three haplotypes of *TYR*.

150 We hypothesized that each of the three haplotypes of *TYR* found among Albinos might  
151 carry a distinct loss-of-function variant in the gene. To search for such variants, we selected one  
152 Albino animal homozygous for each haplotype and sequenced the *TYR* coding regions and  
153 adjacent splice sites in these animals. We found that one of these animals was homozygous for  
154 an aspartic acid-to-glycine variant (*D394G*) in the third coding region of *TYR*. A second animal  
155 was homozygous for a proline-to-leucine variant (*P384L*), also in the third coding region of *TYR*.  
156 Both variants alter conserved residues (Fig 2B), and the *P384L* variant occurs at the same site  
157 as a similar variant (*P384A*) associated with oculocutaneous albinism in humans [93]. The third  
158 animal carried no coding variants and no splice-site variants compared to wildtype. These results  
159 show that two of the three *TYR* haplotypes found among Albinos carried missense variants that  
160 are likely disruptive for *TYR* protein function. We term these *TYR* haplotypes *TYR*<sup>*D394G*</sup> and  
161 *TYR*<sup>*P384L*</sup>. We term the third Albino haplotype, which lacked coding or splice-site variants  
162 compared to wildtype, *TYR*<sup>*Albino*</sup>.

163 We hypothesized that *D394G*, *P384L*, and an unidentified variant on the *TYR*<sup>*Albino*</sup>  
164 haplotype were causative for the Albino color morph. This hypothesis predicts that animals  
165 homozygous or compound heterozygous for these variants will be Albino. Heterozygotes and  
166 non-carriers are predicted to be Non-Albino. To test this prediction, we genotyped our full panel  
167 of 50 Albinos and 56 Non-Albinos for the missense variants *D394G* and *P384L*. Consistent with  
168 our prediction, we found that animals homozygous or compound heterozygous for *D394G*, *P384L*,  
169 or the *TYR*<sup>*Albino*</sup> haplotype were exclusively Albino (Fig 2C). Heterozygotes and non-carriers were  
170 exclusively Non-Albino (Fig 2C). The most common haplotype among Albinos was *TYR*<sup>*Albino*</sup>  
171 (haplotype frequency of 71%), followed by *TYR*<sup>*P384L*</sup> (16%) and *TYR*<sup>*D394G*</sup> (13%). We conclude that  
172 *D394G*, *P384L*, and an unidentified variant on the *TYR*<sup>*Albino*</sup> haplotype are likely causative for the  
173 Albino color morph. Any combination of these variants produces the Albino phenotype.

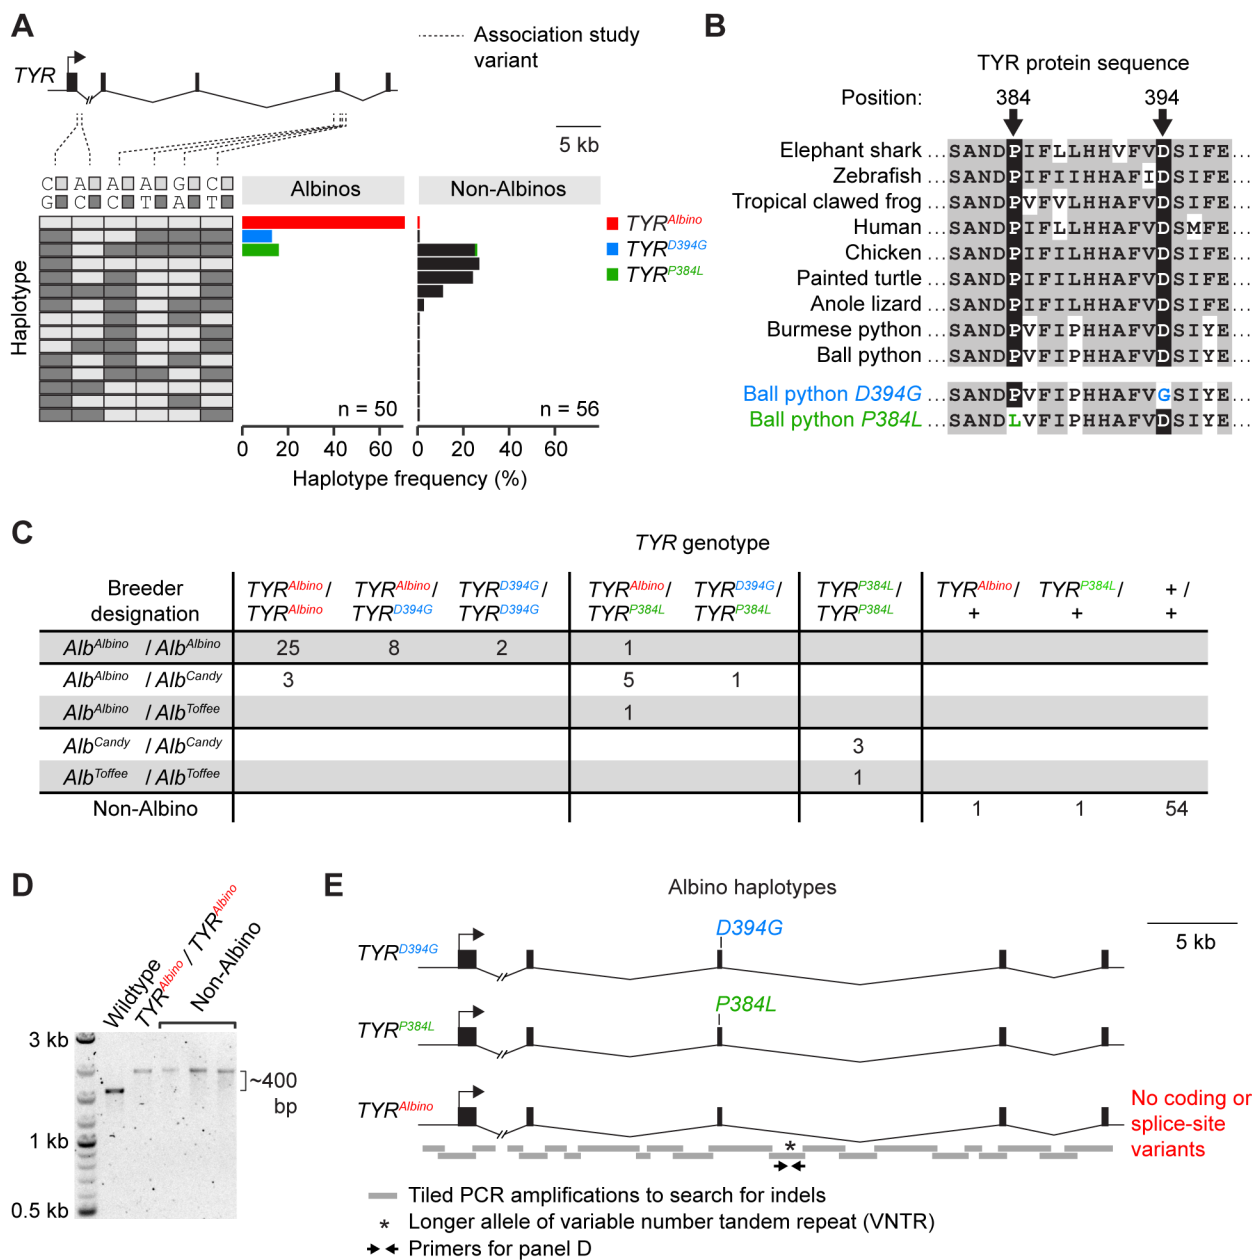

174 **Fig 2. The Albino color morph is associated with three haplotypes of TYR.** (A) TYR haplotype  
 175 frequencies among Albinos and Non-Albinos. (B) Alignment of TYR protein sequences  
 176 surrounding the missense variants *D394G* and *P384L*. (C) TYR genotypes and breeder  
 177 designations of animals used in the association study. +, any TYR haplotype found exclusively  
 178 among Non-Albinos. (D) PCR amplification of a genomic fragment containing the variable number  
 179 tandem repeat (VNTR) shown in E. Non-Albinos are examples of Non-Albinos homozygous for  
 180 the longer allele of the VNTR. (E) Schematic of the three TYR haplotypes found in Albinos. The  
 181 TYR<sup>Albino</sup> haplotype contains no coding variants and no splice-site variants compared to wildtype.  
 182 (A, E) Hash mark, discontinuity in the Burmese python reference genome.

## 183 The *TYR*<sup>Albino</sup> haplotype lacks an obvious loss-of-function 184 variant

185 The lack of coding or splice-site variants on the *TYR*<sup>Albino</sup> haplotype led us to hypothesize  
186 that this haplotype carried a loss-of-function variant in a non-coding region. To search for such  
187 variants, we examined the *TYR* promoter. We sequenced ~2 kb immediately upstream of the *TYR*  
188 start codon in a *TYR*<sup>Albino</sup> homozygote and compared this sequence to wildtype. We found that  
189 the *TYR*<sup>Albino</sup> haplotype differed from wildtype at a total three sites (three single-base  
190 substitutions). In all three cases, the *TYR*<sup>Albino</sup> haplotype was homozygous for the allele shared  
191 with Burmese python (i.e. the ancestral allele). This result suggests that these variants are not  
192 causative for the Albino color morph. We conclude that the causative variant in the *TYR*<sup>Albino</sup>  
193 haplotype does not reside within the sequenced region, ~2 kb upstream of the *TYR* start codon.

194 We hypothesized that the *TYR*<sup>Albino</sup> haplotype might contain a large insertion or deletion  
195 (indel) in an intron that disrupts gene function. Intronic indels can disrupt slicing and have been  
196 found to disrupt the function of melanogenesis genes in other species [e.g. 62,73]. To search for  
197 large intronic indels, we tiled PCR amplicons across *TYR* introns and compared amplicon sizes  
198 between a *TYR*<sup>Albino</sup> homozygote and a wildtype animal. These amplicons tiled across a total of  
199 ~38 kb of intronic sequence, which included part of intron 1 and all of introns 2, 3, and 4 (Fig 2E).  
200 (Tiling across intron 1 was incomplete because this intron contains a discontinuity in the Burmese  
201 python reference genome. Amplification across this discontinuity was unsuccessful in ball python,  
202 even in wildtype.) Size differences between the *TYR*<sup>Albino</sup> homozygote and wildtype were  
203 assessed via standard agarose gel electrophoresis, which we estimate was sensitive enough to  
204 reveal indels larger than ~50-100 bp, depending on amplicon size (which ranged from ~0.7-3.5  
205 kb). This analysis revealed one size difference (Fig 2D). Further sequencing revealed that this  
206 size difference was caused by a variable number tandem repeat (VNTR) that was ~400 bp larger  
207 in the *TYR*<sup>Albino</sup> homozygote than in wildtype. Genotyping of the 56 Non-Albinos for this indel  
208 revealed that eight of these animals were homozygous for the larger allele of the VNTR (Fig 2D).  
209 This finding suggests that the larger allele of the VNTR is not causative for the Albino color morph.  
210 We propose that the *TYR*<sup>Albino</sup> haplotype harbors a loss-of-function variant other than a large  
211 intronic indel or outside the genomic regions analyzed here.

## 212 *TYR*<sup>P384L</sup> is associated with reduced phenotype severity 213 compared to *TYR*<sup>D394G</sup> and *TYR*<sup>Albino</sup>

214 Ball python breeders describe the Albino color morph as having three alleles: *Alb*<sup>Albino</sup>,  
215 *Alb*<sup>Candy</sup>, and *Alb*<sup>Toffee</sup>. Evidence for this view comes in part from variation in the coloration of Albino  
216 animals. In some Albino animals, the brown-to-black coloration observed in wildtype is entirely  
217 absent, and skin patches appear white (Fig 1D). These Albinos are typically considered to be  
218 *Alb*<sup>Albino</sup> homozygotes. Other Albinos show a less severe phenotype, where skin patches are  
219 faintly beige or lavender instead of white (Figs 1E and 1F). These Albinos are typically considered  
220 to carry one or more copies of *Alb*<sup>Candy</sup> or *Alb*<sup>Toffee</sup>.

221 We hypothesized that the Albino alleles recognized by breeders might correspond to the  
222 *TYR* haplotypes identified through sequencing (*TYR*<sup>D394G</sup>, *TYR*<sup>P384L</sup>, and *TYR*<sup>Albino</sup>). To test this  
223 hypothesis, we examined the breeder designations of the 50 Albinos in our panel. We found that  
224 the *Alb*<sup>Candy</sup> or *Alb*<sup>Toffee</sup> designations typically corresponded the *TYR*<sup>P384L</sup> haplotype (Fig 2C). The  
225 *Alb*<sup>Albino</sup> designation typically corresponded to the other two haplotypes (*TYR*<sup>D394G</sup> and *TYR*<sup>Albino</sup>,  
226 Fig 2C). This correspondence was imperfect, and exceptions existed (e.g. three animals  
227 designated as *Alb*<sup>Albino</sup> / *Alb*<sup>Candy</sup> compound heterozygotes did not carry the *TYR*<sup>P384L</sup> haplotype,  
228 Fig 2C). We conclude that the *Alb*<sup>Candy</sup> and *Alb*<sup>Toffee</sup> designations typically (but not exclusively)  
229 represent the *TYR*<sup>P384L</sup> haplotype. The *Alb*<sup>Albino</sup> designation typically (but not exclusively)



230 represents the *TYR*<sup>D394G</sup> or *TYR*<sup>Albino</sup> haplotype. The association between the *Alb*<sup>Candy</sup> and *Alb*<sup>Toffee</sup>  
231 designations and the *TYR*<sup>P384L</sup> haplotype suggests that this haplotype may confer a slightly less  
232 severe phenotype than do *TYR*<sup>D394G</sup> and *TYR*<sup>Albino</sup>.

## 233 **The Lavender Albino color morph is associated with a deletion** 234 **in *OCA2***

235 The Lavender Albino color morph is characterized by skin patches that are lavender  
236 instead of brown or black. This phenotype is thought to arise from melanin levels that are  
237 dramatically reduced but not entirely eliminated. Similar phenotypes have been observed in other  
238 vertebrates upon loss of function of *OCA2* (Table 1). *OCA2* encodes a chloride channel required  
239 for maintaining the pH of melanosomes [87,94]. When the *OCA2* protein is absent or non-  
240 functional, the enzymes that synthesize melanin are less active, and only small amounts of  
241 melanin are produced [95,96]. The resulting phenotype is typically less severe than the loss-of-  
242 function phenotype of *TYR*, but more severe than the loss-of-function phenotypes of other  
243 melanogenesis genes (Table 1). We therefore hypothesized that the Lavender Albino color morph  
244 was caused by loss-of-function variants in *OCA2*.

245 To search for loss-of-function variants in *OCA2*, we selected a single Lavender Albino  
246 animal and sequenced 23 of the 24 coding regions of *OCA2* in this animal. Comparison of these  
247 sequences to wildtype revealed no coding variants and no splice-site variants. We attempted to  
248 repeat this analysis for the remaining coding region (coding region 18), but we were unable to  
249 amplify this coding region from the Lavender Albino animal. Further test amplifications revealed  
250 that the Lavender Albino animal was homozygous for a 1,514-bp deletion spanning coding region  
251 18 (Figs 3A and 3B). This deletion removes 36 amino acids from the protein and likely introduces  
252 a frameshift into the transcript, given that the coding regions downstream of the deletion are out  
253 of frame compared to coding regions upstream of the deletion (Fig 3E). This frameshifted  
254 transcript is predicted to produce a protein lacking six of the 12 transmembrane helices present  
255 in wildtype *OCA2*. Truncations occurring at similar positions in the *OCA2* protein have been  
256 identified in humans and are associated with oculocutaneous albinism [97]. We conclude that the  
257 deletion of *OCA2* coding region 18 likely disrupts protein function and is a strong candidate for  
258 the cause of the Lavender Albino color morph.

259 The Lavender Albino color morph is considered by breeders to have a single allele. We  
260 therefore predicted that the *OCA2* deletion would be shared by other Lavender Albino animals.  
261 We predicted that Non-Lavender Albinos would be heterozygous for the deletion or non-carriers.  
262 To test this prediction, we genotyped the *OCA2* deletion in 13 additional Lavender Albino animals.  
263 We also genotyped 76 Non-Lavender Albinos and one animal described as heterozygous for the  
264 Lavender Albino color morph. We found that all 13 Lavender Albinos were homozygous for the  
265 deletion (Figs 3C and 3D). All 76 Non-Lavender Albinos were non-carriers. The animal reported  
266 to be heterozygous for Lavender Albino was heterozygous for the deletion. These findings support  
267 the conclusion that the *OCA2* deletion is causative for the Lavender Albino color morph (Fig 3E).

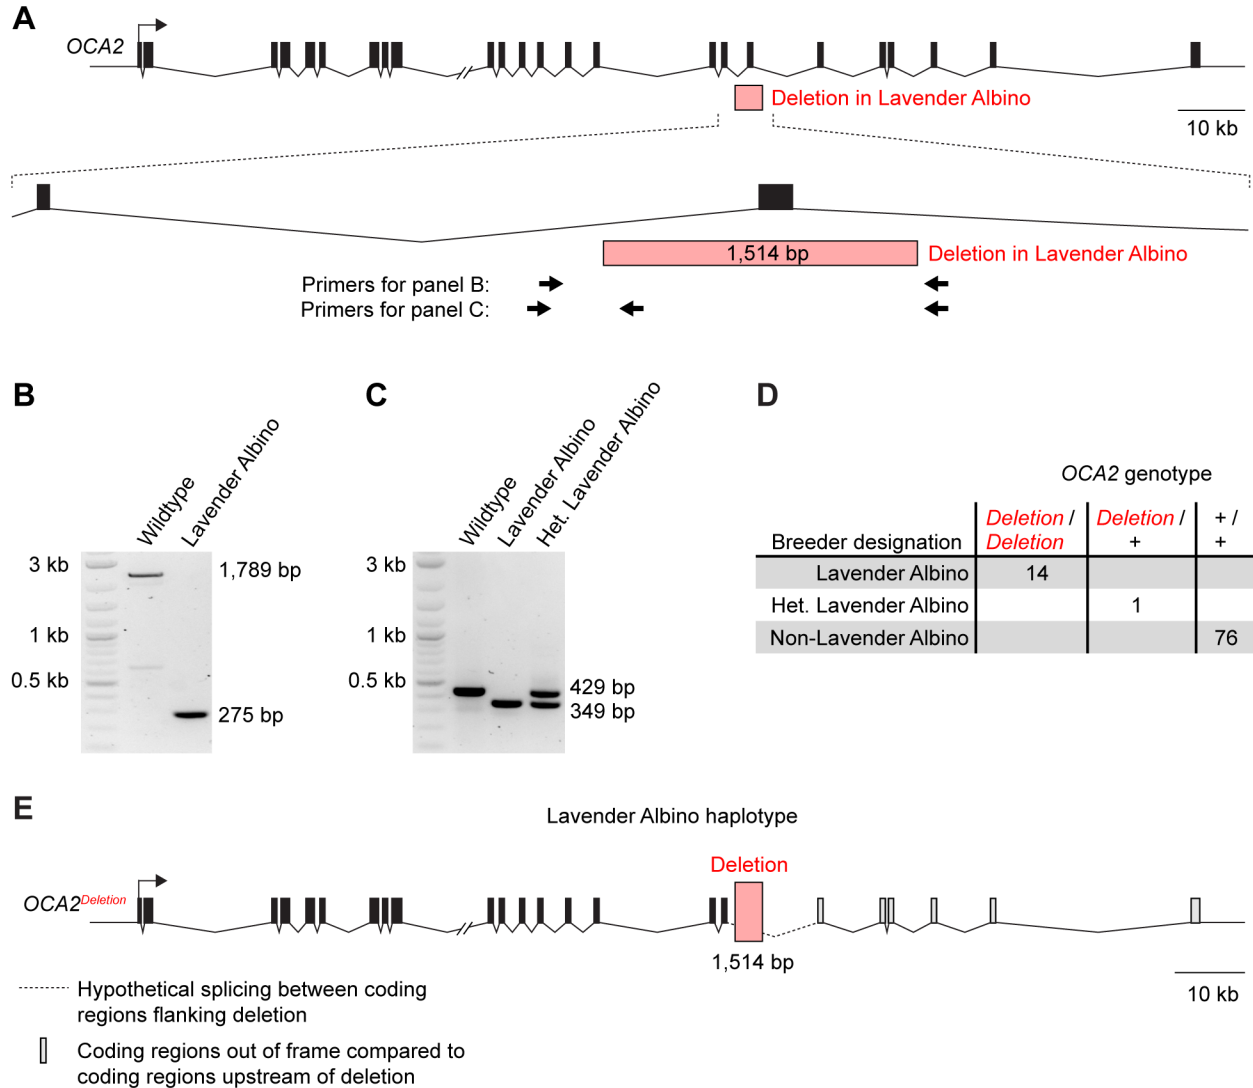

268 **Fig 3. The Lavender Albino color morph is associated with a deletion in OCA2.** (A)  
 269 Schematic of the OCA2 gene. (B) PCR amplification demonstrating the deletion in Lavender  
 270 Albino. (C) PCR amplification used for genotyping the deletion in the animals in panel D. (D)  
 271 Genotypes of 14 Lavender Albinos, 76 Non-Lavender Albinos, and one animal described as  
 272 heterozygous for Lavender Albino. This set of animals includes the original Lavender Albino  
 273 animal in which the OCA2 deletion was identified. (E) Schematic of the OCA2 haplotype found in  
 274 Lavender Albinos. (A, E) Hash mark, discontinuity in the Burmese python reference genome.

## 275 **The Ultramel color morph is associated with a missense** 276 **variant and a putative deletion in *TYRP1***

277 The Ultramel color morph is characterized by skin patches that are tan or light brown,  
278 rather than dark brown or black. This phenotype suggests a mild loss of melanin. Similar  
279 phenotypes in other vertebrates have been observed upon loss of function of any five genes:  
280 *TYRP1*, *TYRP2*, *SLC7A11*, *SLC24A5*, and *SLC45A2* (Table 1). *TYRP1* and *TYRP2* encode  
281 enzymes involved in synthesizing melanin [86]. Their enzymatic activities are partially reductant  
282 with other enzymes in the melanin synthesis pathway, thus explaining their milder loss-of-function  
283 phenotypes compared to *TYR*. *SLC7A11* encodes a transporter responsible for importing cystine  
284 into the cell [98]. Cystine is a precursor to some forms of melanin, and hence absence of the  
285 transporter alters melanin levels [76]. *SLC24A5* and *SLC45A2* encode a K<sup>+</sup>-dependent Na<sup>+</sup>-Ca<sup>2+</sup>  
286 exchanger [88] and a putative sugar transporter [89], respectively. Loss of either of these proteins  
287 causes a reduction in melanin, through mechanisms that may involve defects in regulation of  
288 melanosome pH [83,88,99]. We hypothesized that the Ultramel color morph was caused by loss-  
289 of-function variants in one of these genes.

290 To search for loss-of-function variants in *TYRP1*, *TYRP2*, *SLC7A11*, *SLC24A5*, and  
291 *SLC45A2*, we selected a single Ultramel animal and sequenced the coding regions of each of  
292 these genes in this animal. Comparison of these sequences to wildtype revealed a single coding  
293 variant: an arginine-to-histidine substitution (*R305H*) in coding region 4 of *TYRP1*. The Ultramel  
294 animal was homozygous for this variant. The arginine residue at this site is conserved across  
295 vertebrates (Fig 4A) and is also conserved in *TYR*, which is paralogous to *TYRP1* [100]. An  
296 arginine-to-histidine substitution at the homologous site in *TYR* has been reported in humans and  
297 is associated with oculocutaneous albinism [101–103], suggesting that a histidine at this site is  
298 disruptive to protein function. The *R305H* variant is therefore a good candidate for the cause of  
299 the Ultramel color morph.

300 The Ultramel color morph is considered by breeders to have a single allele. We therefore  
301 predicted that the *R305H* variant would be shared by other Ultramels. We predicted that Non-  
302 Ultramels would be heterozygous or non-carriers. To test this prediction, we genotyped the  
303 *R305H* variant in 10 additional Ultramels and 78 Non-Ultramels. We found that five of the 10  
304 Ultramels were homozygous for the *R305H* variant (Fig 4B). Of the remaining Ultramels, two were  
305 heterozygous for the *R305H* variant, and three did not carry it. By contrast, none of the 78 Non-  
306 Ultramels carried the *R305H* variant. This pattern is consistent with the *R305H* variant causing  
307 the Ultramel phenotype in some Ultramels but not others.

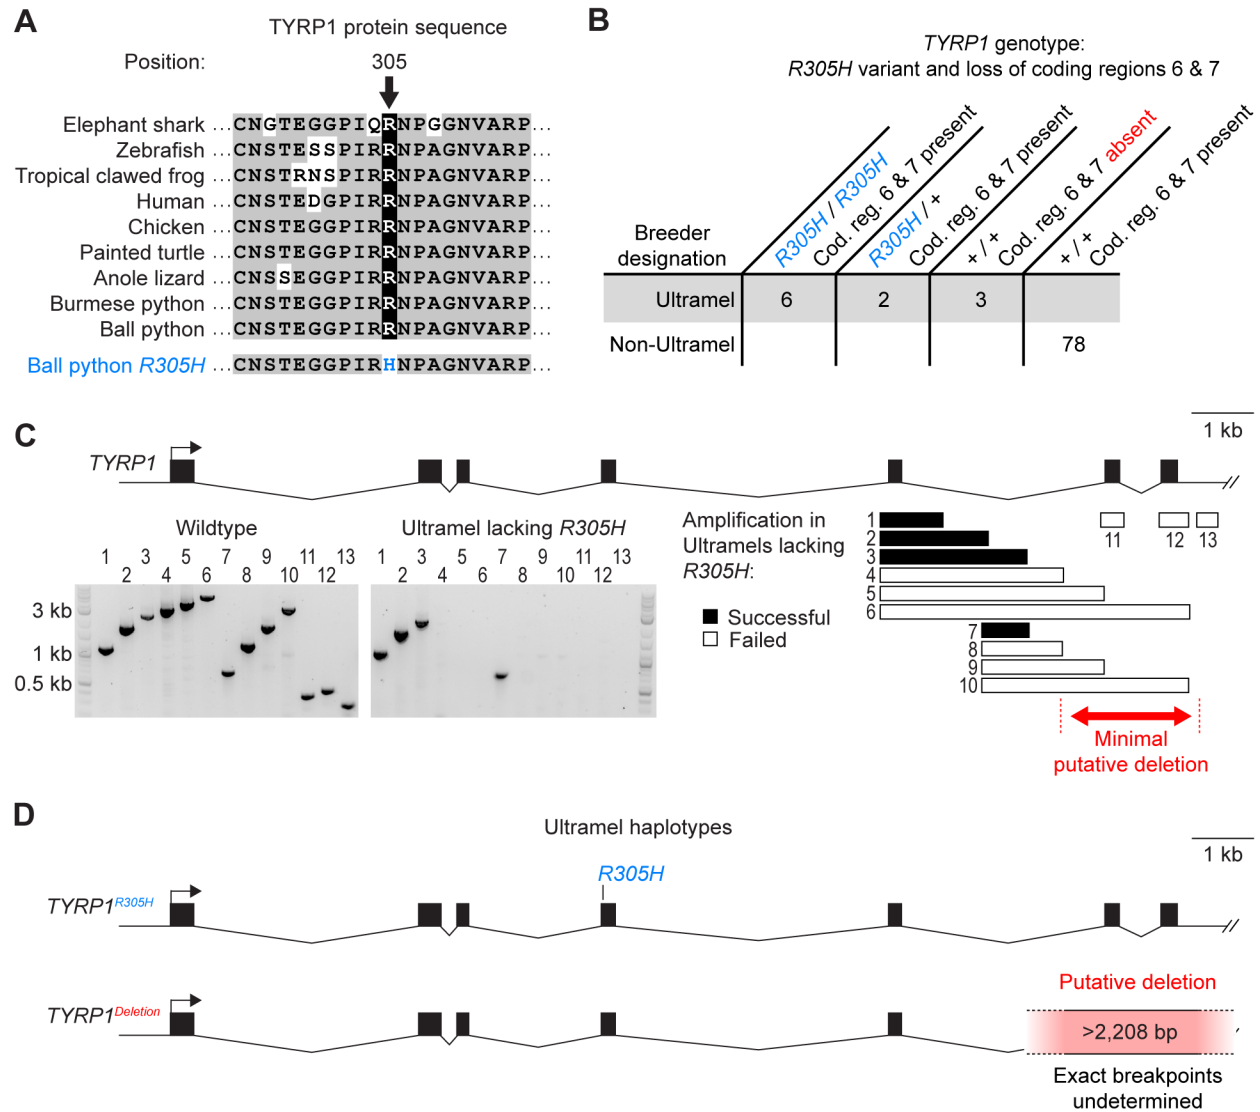

308 **Fig 4. The Ultramel color morph is associated with a missense variant and a putative**  
 309 **deletion in TYRP1.** (A) Alignment of TYRP1 protein sequence surrounding missense variant  
 310 *R305H*. (B) Genotypes of 11 Ultramels and 78 Non-Ultramels. This set of animals includes the  
 311 original Ultramel animal in which the *R305H* variant was identified. Ultramels heterozygous for  
 312 *R305H* are presumed to be heterozygous for the putative deletion of coding regions 6 and 7;  
 313 testing these animals for the putative deletion was not possible because the putative deletion  
 314 cannot be detected in the heterozygous state. (C) Top, schematic of the TYRP1 gene. Bottom  
 315 left, PCR amplifications demonstrating the putative deletion in the Ultramels lacking *R305H*.  
 316 Bottom right, alignment of PCR amplicons to the TYRP1 gene. (D) Schematic of the two TYRP1  
 317 haplotypes found in Ultramels. (A, D) Hash mark, discontinuity in the Burmese python reference  
 318 genome.

319 We hypothesized that the *R305H* variant represents one of two loss-of-function alleles of  
320 *TYRP1*. Under this scenario, Ultramels lacking the *R305H* variant are predicted to be  
321 homozygous for an alternate loss-of-function allele. Ultramels heterozygous for *R305H* are  
322 predicted to be compound heterozygotes. To test this prediction, we amplified and sequenced  
323 coding regions 1 through 5 of *TYRP1* in one of the three Ultramels lacking the *R305H* variant. We  
324 found no coding variants and no splice-site variants compared to wildtype. We attempted to repeat  
325 this analysis for coding regions 6 and 7 of *TYRP1*, but we were unable to amplify these coding  
326 regions from this animal (Fig 4C). Identical results were observed for the other two Ultramels  
327 lacking the *R305H* variant (S5 Table). Further test amplifications indicated that coding regions 6  
328 and 7 were missing from the genomes of all three animals (Fig 4C, S5 Table). Loss of these  
329 coding regions was specific to Ultramels lacking the *R305H* variant and did not occur in any of  
330 the Ultramels carrying the *R305H* variant, nor in any of the 78 Non-Ultramels (Fig 4B). A simple  
331 explanation of this pattern is that the Ultramels lacking the *R305H* variant were homozygous for  
332 a deletion spanning coding regions 6 and 7 of *TYRP1*. This putative deletion removes at least  
333 2,208 bp from the genome and 117 amino acids from the TYRP1 protein, including the second of  
334 two zinc-binding domains. (The exact size and breakpoints of the putative deletion remain  
335 undetermined because the deletion extends into a discontinuity in the Burmese python reference  
336 genome.) Truncations occurring at similar positions in the TYRP1 protein have been identified in  
337 humans and are associated with oculocutaneous albinism [104]. We conclude that the Ultramel  
338 color morph is likely caused by variants in *TYRP1* and has two alleles: missense variant *R305H*  
339 and a putative deletion of coding regions 6 and 7 (Fig 4D).

## 340 Discussion

341 The goal of our study was to use pet samples recruited from the community to identify the  
342 genetic causes of the Albino, Lavender Albino, and Ultramel color morphs. We succeeded in  
343 recruiting 11 or more animals for each morph, along with a larger number of animals not belonging  
344 to these morphs. This sample size, albeit small, was sufficient to identify putatively causal variants  
345 for each morph (Fig 5). The Albino color morph was associated with three alleles of *TYR*:  
346 missense variant *D394G*, missense variant *P384L*, and haplotype *TYR<sup>Albino</sup>*, which lacks coding  
347 or splice-site variants compared to wildtype. The Lavender Albino color morph was associated  
348 with a single allele of *OCA2*, a 1,514-bp deletion that removes *OCA2* coding region 18. The  
349 Ultramel color morph was associated with two alleles of *TYRP1*: missense variant *R305H* and a  
350 putative deletion that removes *TYRP1* coding regions 6 and 7. Due to the small sample size of  
351 our study, we cannot exclude the possibility of additional loss-of-function alleles of these genes.  
352 However, such alleles are expected to be at low frequency in the ball python population, given  
353 their absence from our sample. These findings are consistent with genetic data from other  
354 vertebrates (Table 1), indicating that the loss-of-function phenotypes of these genes range from  
355 severe (*TYR*) to moderate (*OCA2*) to mild (*TYRP1*). Our study demonstrates that pet ball pythons  
356 are a tractable resource for genetic analysis of coloration in reptiles, at least for color morphs  
357 having obvious candidate genes.

| Phenotype                | Color morph                                                                       | Associated genetic variant(s)                                                                                                                                                                                                                                                        |
|--------------------------|-----------------------------------------------------------------------------------|--------------------------------------------------------------------------------------------------------------------------------------------------------------------------------------------------------------------------------------------------------------------------------------|
| Severe loss of melanin   | Albino                                                                            | Three alleles of <i>TYR</i> : <ul style="list-style-type: none"> <li>• Missense variant <i>D394G</i></li> <li>• Missense variant <i>P384L</i></li> <li>• Haplotype <i>TYR<sup>Albino</sup></i>, which lacks coding variants and splice-site variants compared to wildtype</li> </ul> |
|                          |  |                                                                                                                                                                                                                                                                                      |
| Moderate loss of melanin | Lavender Albino                                                                   | One allele of <i>OCA2</i> : <ul style="list-style-type: none"> <li>• Deletion of coding region 18</li> </ul>                                                                                                                                                                         |
| Mild loss of melanin     | Ultramel                                                                          | Two alleles of <i>TYRP1</i> : <ul style="list-style-type: none"> <li>• Missense variant <i>R305H</i></li> <li>• Putative deletion of coding regions 6 and 7</li> </ul>                                                                                                               |

358 **Fig 5. Summary of genetic variants associated with the Albino, Lavender Albino, and**  
 359 **Ultramel color morphs.** Photo credits, Ryan Young of Molecular Reptile, Chiron Graves, Phil  
 360 Barclay, Michael Freedman of The Florida Reptile Ranch.

## 361 **Molecular functions of genetic variants associated with color** 362 **morphs**

363 The missense variants and deletions found in *TYR*, *TYRP1*, and *OCA2* are likely  
 364 hypomorphic or null alleles. The deletion in *OCA2* likely results in a frameshifted transcript that, if  
 365 not degraded by nonsense-mediated decay, encodes a protein lacking six of *OCA2*'s 12  
 366 transmembrane helices [94]. This truncated protein is therefore unlikely to retain the Cl<sup>-</sup> channel  
 367 activity observed for wildtype *OCA2* [87]. *TYR* and *TYRP1* encode globular enzymes that require  
 368 copper or zinc as co-factors [86]. Variants *P384L* and *D394G* in *TYR* reside in the second of  
 369 *TYR*'s two copper-binding domains and may therefore alter the ability of the *TYR* to bind copper.  
 370 Variant *R305H* in *TYRP1* occurs at a site that normally forms salt bridges with residues located  
 371 elsewhere in the peptide chain [86]. An arginine-to-histidine substitution at this site likely disrupts  
 372 these salt bridges and may therefore interfere with proper protein folding. The putative deletion in  
 373 *TYRP1* removes the C-terminal ~20% of the protein. This deleted region includes the second of  
 374 *TYRP1*'s two zinc-binding domains and several alpha helices residing to the enzyme's  
 375 hydrophobic core [86]. Truncated *TYRP1* protein is therefore unlikely to fold properly, nor is it  
 376 likely to properly associate with zinc.

377 The *TYR<sup>Albino</sup>* haplotype is the most common *TYR* haplotype found among Albinos, but it  
 378 lacks an obvious loss-of-function variant. This haplotype contains no coding variants, no splice-  
 379 site variants, no derived variants within 2 kb upstream of the start codon, and no large indels in  
 380 three of four introns (with the exception of a longer allele of a VNTR, which is not specific to the  
 381 *TYR<sup>Albino</sup>* haplotype). We propose that the *TYR<sup>Albino</sup>* haplotype contains a loss-of-function variant

382 not detectable by methods used in the current study. Examples include regulatory variants farther  
383 upstream of the start codon, substitutions in introns that disrupt slicing, or large indels or  
384 rearrangements involving the first intron. Cryptic loss-of-function variants in melanogenesis genes  
385 are thought to be relatively common in humans, where ~10-20% of oculocutaneous albinism  
386 patients are heterozygous for pathogenic variants in a known melanogenesis gene but lack a  
387 coding or splice-site variant on the opposite allele [105–107].

## 388 **Multiple alleles of the Albino color morph**

389 Prior to the current study, the Albino color morph was recognized by breeders as having  
390 three alleles: *Alb<sup>Albino</sup>*, *Alb<sup>Candy</sup>*, and *Alb<sup>Toffee</sup>*. *Alb<sup>Albino</sup>* was thought to confer a more severe  
391 phenotype than *Alb<sup>Candy</sup>* and *Alb<sup>Toffee</sup>* (Figs 1D-F). Our results confirm that the Albino color morph  
392 has three molecular alleles (*TYR<sup>D394G</sup>*, *TYR<sup>P384L</sup>*, and *TYR<sup>Albino</sup>*), but these alleles do not  
393 correspond to the alleles recognized by breeders. The molecular allele *TYR<sup>P384L</sup>* typically  
394 corresponds to the breeder designations *Alb<sup>Candy</sup>* and *Alb<sup>Toffee</sup>*, whereas the molecular alleles  
395 *TYR<sup>D394G</sup>* and *TYR<sup>Albino</sup>* typically correspond to the breeder designation *Alb<sup>Albino</sup>* (Fig 2C). This  
396 correspondence is imperfect and exceptions exist (Fig 2C).

397 We speculate that the *TYR<sup>P384L</sup>* haplotype was discovered twice and was named *Alb<sup>Candy</sup>*  
398 by one breeder and *Alb<sup>Toffee</sup>* by another breeder. We speculate that *TYR<sup>D394G</sup>* and *TYR<sup>Albino</sup>* confer  
399 similar phenotypes and were not previously recognized by breeders as distinct. The less severe  
400 phenotype associated with *TYR<sup>P384L</sup>* may reflect the *P384L* variant being less disruptive to gene  
401 function compared with variants on the other two alleles. Alternatively, the less severe phenotype  
402 associated with *TYR<sup>P384L</sup>* may reflect genetic linkage to modifiers in other genes. In either case,  
403 our study demonstrates that the Albino allele designations current in use by breeders are not an  
404 accurate reflection of molecular genotype. Renaming of the Albino alleles is warranted, although  
405 owners and breeders may be resistant to renaming due to cultural attachment to existing allele  
406 names.

## 407 **Multiple alleles of the Ultramel color morph**

408 Our finding of multiple *TYRP1* alleles for the Ultramel color morph was unexpected. This  
409 morph was not previously described as having multiple alleles. We speculate that one of the two  
410 alleles associated with the Ultramel color morph may represent an allele originally associated with  
411 a morph known as Caramel Albino. Multiple lineages of Caramel Albinos have been described,  
412 and their coloration similar to Ultramels. Caramel Albinos have been disfavored among owners  
413 and breeders because of spinal kinking and reduced female fertility. Caramel Albinos were not  
414 included in our study because we were unable to recruit any Caramel Albino samples. We  
415 speculate that the Caramel Albino morph may be allelic with Ultramel, and that one of two *TYRP1*  
416 alleles associated with Ultramel may represent an allele originally described as Caramel Albino.  
417 Alternately, Ultramel may be distinct from Caramel Albino, and the two *TYRP1* alleles may  
418 represent two distinct origins of the Ultramel morph.

## 419 **Prospects for genetic testing**

420 Many breeders of ball pythons wish to identify heterozygotes of recessive color morphs.  
421 Currently the only tool for identifying heterozygotes is test breeding, which is slow and laborious.  
422 The results of the current study will enable simple genetic testing for Albino, Lavender Albino, and  
423 Ultramel, which will allow heterozygotes to be identified prior to reproductive maturity. Testing for  
424 Lavender Albino can be performed by genotyping the *OCA2* deletion. Testing for Albino can be  
425 performed by sequencing the *TYR* missense variants *D394G* and *P384L*, and by genotyping  
426 variants that distinguish the *TYR<sup>Albino</sup>* haplotype from other *TYR* haplotypes. Detection of *D394G*  
427 or *P384L* can be considered diagnostic for Albino because these variants are likely causative for  
428 the Albino color morph. Detection of the *TYR<sup>Albino</sup>* haplotype is less diagnostic because the

429 causative variant on *TYR*<sup>Albino</sup> haplotype remains unknown. Testing for one of the two Ultramel  
430 alleles can be performed by sequencing the *TYRP1* missense variant *R305H*. The other Ultramel  
431 allele—the putative deletion of *TYRP1* coding regions 6 and 7—cannot currently be detected in  
432 heterozygotes using simple methods because the breakpoints of this putative deletion are  
433 unknown.

## 434 Use of Burmese python reference genome

435 One challenge for genetic studies in ball python is the absence of a reference genome.  
436 To fill this gap, we relied on the genome of Burmese python [90], which is a scaffold-level  
437 assembly. Contigs in this assembly are small, and genes are sometimes fragmented across  
438 scaffolds. This fragmentation limited our analysis of the *TYR*<sup>Albino</sup> haplotype and the putative  
439 deletion in *TYRP1*. For *TYR*<sup>Albino</sup>, we were unable to assess whether the *TYR*<sup>Albino</sup> haplotype  
440 contained a large indel or rearrangement in the first intron of *TYR*, due to a discontinuity in the  
441 Burmese python genome in this region. For the putative deletion in *TYRP1*, we were unable to  
442 map the exact breakpoints of the deletion, due to a discontinuity in the Burmese python genome  
443 immediately downstream of *TYRP1*. As genomic resources for Burmese python and ball python  
444 expand, we expect to identify a putatively causative variant on the *TYR*<sup>Albino</sup> haplotype and to map  
445 the breakpoints of the putative deletion in *TYRP1*. This information will increase the prospects for  
446 genetic testing for these alleles.

## 447 Ball pythons as a genetic system

448 The market for pet ball pythons is huge, and many owners prefer animals with novel color  
449 patterns. This demand has led breeders to propagate genetic variants affecting coloration [31,33].  
450 This effort has fortuitously created a collection of "mutants" useful for understanding the genetics  
451 of coloration in reptiles. Examples include ball python morphs with altered red-to-yellow coloration  
452 (e.g. Axanthic) and morphs in which the normal mottled color pattern is converted to dorsal stripes  
453 (e.g. Clown, Genetic Stripe, Super Stripe). Red-to-yellow pigments are largely uncharacterized in  
454 reptiles [although see 28,29], and morphs affecting these pigments may provide insight into the  
455 metabolism and storage of these pigments. Morphs with stripes are reminiscent of evolutionary  
456 changes in color patterning across snake species [108] and may provide insights into the  
457 developmental mechanisms by which these changes evolve. Future studies of ball python color  
458 morphs will be aided by our groundwork showing that ball python samples can be recruited  
459 effectively from pet owners, and that genetic analyses in ball python can be scaffolded using the  
460 genome of Burmese python as a reference. Similar groundwork has also been provided by a  
461 recent study characterizing the ball python morph known as Piebald [26]. We expect that a  
462 continued community-science approach will be effective in developing ball pythons into a resource  
463 for understanding the genetics of reptile coloration.

## 464 Materials and methods

### 465 Recruitment of ball python sheds

466 Ball python sheds were recruited from pet owners and breeders by placing  
467 announcements in Twitter, Reddit, Instagram, and Facebook, and by contacting sellers having  
468 active listings on Morph Market ([www.morphmarket.com](http://www.morphmarket.com)). Contributors were instructed to allow  
469 sheds to dry (if wet) and to ship sheds via standard first-class mail. Contributors sending multiple  
470 sheds were instructed to package sheds individually in plastic bags during shipping. Contributors  
471 were not provided monetary compensation for sheds, although some contributors were given pre-  
472 paid shipping envelopes to cover shipping costs. Contributors were thanked via social media



473 whenever possible. Upon receipt, sheds were stored at -20°C to kill any insect larvae infesting  
474 the sheds.

475 To maximize genetic diversity within each category of morph, we limited our sample of  
476 animals of any one morph to animals contributed by different contributors. Exceptions were made  
477 if animals contributed by the same contributor had been obtained from different breeders. The  
478 goal of this strategy was to reduce the number of animals that were close relatives (e.g. siblings  
479 or parent-offspring pairs). Obtaining full pedigree information was not possible because most  
480 owners lacked this information (e.g. “I bought my animal at a pet store” or “I got my animal from  
481 a friend who was moving away”). Our discovery of multiple alleles for the Albino and Ultramel  
482 color morphs supports the idea that animals in our sample were derived from multiple lineages.  
483 However, we cannot exclude the possibility that some animals in our sample may have been  
484 close relatives.

485 The total set of animals comprised 50 Albinos, 14 Lavender Albinos, 11 Ultramels, one  
486 animal described as heterozygous for Lavender Albino, and 46 animals described as having  
487 normal coloration (i.e. wildtype) or belonging to color morphs other than Albino, Lavender Albino,  
488 or Ultramel. Phenotypes of Albinos, Lavender Albinos, and Ultramels were confirmed by  
489 examining shed skins for a reduction of brown-to-black coloration. The single animal described  
490 as heterozygous for Lavender Albino was included to demonstrate the three-primer assay for  
491 genotyping the OCA2 deletion. Heterozygotes for Albino or Ultramel and additional heterozygous  
492 for Lavender Albino were excluded from our study because we have found that animals described  
493 as heterozygous for recessive traits by breeders and owners are sometimes not heterozygous for  
494 these traits (e.g. due to mis-attribution of paternity).

## 495 **Performing experiments in an undergraduate laboratory** 496 **course**

497 The majority of experiments and analyses described in this study were performed by  
498 undergraduate students as part of a laboratory course at Eastern Michigan University (BIO306W).  
499 This practice required that our experimental design rely on simple techniques, namely PCR and  
500 Sanger sequencing. To avoid student errors in these techniques, we implemented the following  
501 precautions. First, students never extracted DNA from more than one animal within the same  
502 laboratory period. Second, students performed negative and positive control reactions for all PCR  
503 amplifications. Data from students having incorrect controls were excluded from analysis. Third,  
504 all sequence analyses were performed independently by three or more students. When the results  
505 of all students did not all agree, sequences were re-analyzed by the instructor (HSS).

## 506 **Annotation of melanogenesis genes in Burmese python**

507 Our analyses in ball python used the genome of Burmese python as a reference. We  
508 therefore required high-confidence gene annotations in Burmese python for the genes used in  
509 our study (*TYR*, *TYRP1*, *TYRP2*, *OCA2*, *SLC7A11*, *SLC24A5*, and *SLC45A2*). Preliminary  
510 inspection of existing gene annotations in Burmese python suggested that many gene annotations  
511 contained errors. A main cause of these errors was that the Burmese python genome  
512 (*Python\_molurus\_bivittatus-5.0.2*) is a scaffold-level assembly; many genes were split across  
513 scaffolds. We therefore curated new gene annotations in Burmese python, using conservation of  
514 gene structure across species. Alignment of protein sequences for each gene from corn snake,  
515 anole lizard, chicken, and/or mouse revealed that gene structure was highly conserved for all  
516 seven genes: Genes in each species contained the same number of coding regions, and the  
517 coding-region boundaries relative to protein sequences were perfectly conserved across species,  
518 with the exception of one slight difference in mouse for one boundary of *SLC45A2* (S2 Table).  
519 We therefore felt confident that conservation of coding-region boundaries could be used to curate

520 new gene annotations in Burmese python. While it remains theoretically possible that our new  
521 gene annotations contain minor errors, our confidence in these gene annotations is high, given  
522 the high conservation of gene structure across species.

523 To curate new gene annotations, we performed TBLASTN searches of the Burmese  
524 python genome (*Python molurus bivittatus-5.0.2*) using protein sequences from anole lizard or  
525 corn snake as the query. Hits were examined manually. Gene annotations were built to match the  
526 coding-region boundaries conserved across species. Details for each gene annotation are given  
527 below.

## 528 **TYR**

529 The Burmese python genome was queried using TYR protein sequence from anole lizard  
530 (*XP\_003219419.1*). The N-terminus of this query (coding region 1) hit Burmese python transcript  
531 *XM\_007438960.1* on scaffold 4418. The C-terminus of this query (coding regions 2 to 5) hit  
532 Burmese python transcript *XM\_007436041.2* on scaffold 3103. TYR was annotated as the union  
533 of these transcripts. The 3' boundary of coding region 1 was adjusted to match the boundary  
534 conserved across species (...TTC TCT TCA TGG CAA-3').

## 535 **TYRP1**

536 The Burmese python genome was queried using TYRP1 protein sequence from corn  
537 snake (*XP\_034266320.1*). The N-terminus of this query (coding regions 1 to 5) hit Burmese  
538 python transcript *XM\_007426971.3* on scaffold 801. The C-terminus of this query (coding regions  
539 6 and 7) hit unannotated regions on this same scaffold. *TYRP1* was annotated as the union of  
540 transcript *XM\_007426971.3* and coding regions 6 and 7. The boundaries of coding regions 6 and  
541 7 were built to match the boundaries conserved across species (coding region 6, 5'-ATA TCT  
542 CAA CAT ACC...AAG TTC AGT GGC CAT-3'; coding region 7, 5'-CAC AAG CTC TCC  
543 ATG...CAG TCA GAT GTG TGA-3').

## 544 **TYRP2**

545 The Burmese python genome was queried using TYRP2 protein sequence from corn  
546 snake (*XP\_034273310.1*). The N-terminus of this query (coding regions 1 to 3) hit unannotated  
547 regions on Burmese python scaffold 4970. The C-terminus of this query (coding regions 4 to 8)  
548 hit Burmese python transcript *XM\_025174219.1* on this same scaffold. *TYRP2* was annotated as  
549 the union of coding regions 1 to 3 and C-terminal five coding regions of transcript  
550 *XM\_025174219.1*. Transcript *XM\_025174219.1* contains a sixth coding region that does not  
551 match *TYRP2* and was therefore excluded from the gene annotation. The boundaries of coding  
552 regions 1 to 3 were built to match the boundaries conserved across species (coding region 1, 5'-  
553 ATG GCC TTC CTG CTG...GTT GCC AAT GCA CAG-3'; coding region 2, 5'-GAC ATT TTG  
554 CTG GCT...GAG ATA CTC TAT TAG-3'; coding region 3, 5'- GAC CAG GCC GTC CCT...GAA  
555 AGA GAT CTG CAG-3').

## 556 **OCA2**

557 The Burmese python genome was queried using OCA2 protein sequence from corn snake  
558 (*XP\_034287267.1*). The N-terminus of this query (coding regions 1 to 9) hit Burmese python  
559 transcript *XM\_025173964.1* on scaffold 4704. The C-terminus of this query (coding regions 10 to  
560 24) hit Burmese python transcript *XM\_007433276.1* on scaffold 2194. *OCA2* was annotated as  
561 the union of these transcripts. The 5' boundary of coding region 10 was adjusted to match the  
562 boundary conserved across species (5'-ATT GTC CAC AGG ACA...).

## 563 **SLC7A11**

564 The Burmese python genome was queried using SLC7A11 protein sequence from corn  
565 snake (*XP\_034257397.1*). All regions of the query hit Burmese python transcript  
566 *XM\_007430906.3* on scaffold 1543. *SLC7A11* was annotated as transcript *XM\_007430906.3*,  
567 with no further adjustments.

## 568 **SLC24A5**

569 The Burmese python genome was queried using SLC24A5 protein sequence from corn  
570 snake (*XP\_034290605.1*) extended at its N-terminus to an upstream start codon present in the  
571 parent transcript (*XM\_034434714.1*). The N-terminus of the query (coding region 1) hit an  
572 unannotated region on Burmese python scaffold 3984. The C-terminus of this query (coding  
573 regions 2 to 9) hit Burmese python transcript *XM\_007438007.2* on this same scaffold. *SLC24A5*  
574 was annotated as the union of coding region 1 and transcript *XM\_007438007.2*. The boundaries  
575 of coding region 1 were built to match the boundaries conserved across species (5'-ATG CAG  
576 CCT GCC GAG...TCC GCG AGG ATC CCG -3'). The 5' boundary of coding region 2 was  
577 adjusted to match the boundary conserved across species (5'-AGA ACG AAA CCC GCT...).

## 578 **SLC45A2**

579 The Burmese python genome was queried using *SLC45A2* protein sequence from corn  
580 snake (*XP\_034298386.1*). The N-terminal region of this query (coding regions 1 and 2) hit  
581 Burmese python transcript *XM\_007432459.2* on scaffold 1939. The C-terminal region of this  
582 query (coding regions 5 to 7) hit Burmese python transcript *XM\_007437721.2* on scaffold 3858.  
583 *SLC45A2* was annotated as the union of these transcripts.

## 584 **DNA extraction**

585 Sheds were rinsed in tap water to remove dirt and debris. Sheds were air dried and lysed  
586 overnight at ~60°C in ~1 ml lysis buffer (100 mM Tris-HCl pH 8.0, 100 mM EDTA, 2% sodium  
587 dodecyl sulfate, 3 mM CaCl<sub>2</sub>, 2 mg/ml Proteinase K) per ~8 cm<sup>2</sup> piece of shed. Lysate was  
588 separated from visible fragments of undigested shed and further cleared by centrifugation at  
589 13,000 x g for 2 min. To precipitate protein, ammonium acetate was added to supernatant to a  
590 final concentration of 1.875 M. Samples were incubated on ice for 5-10 min and centrifuged at  
591 13,000 x g for 3-5 min at 4°C. Supernatant was mixed with an equal volume of magnetic bead  
592 mixture (10 mM Tris-HCl pH 8.0, 1 mM EDTA, 1.6 M NaCl, 0.2% Tween-20, 11% polyethylene  
593 glycol, 0.04% washed SpeedBeads [Sigma #GE45152105050250]), and samples shaken for 5-  
594 10 min. Beads were separated from supernatant using a magnet, washed twice in 0.2 ml 70%  
595 ethanol for 2 min, and air dried for ~1 min. DNA was eluted from beads in TE buffer (10 mM Tris-  
596 HCl pH 8.0, 1 mM EDTA) at 65°C for >5 min.

## 597 **Primer design and PCR**

598 Primers were designed against the genome of Burmese python or against genomic  
599 sequences from ball python obtained in an earlier step of the study. Primers were designed using  
600 Primer3 [109], using default parameters and a target annealing temperature of 60°C. Amplification  
601 was first tested at 57°C, to allow for occasional divergence between ball python and Burmese  
602 python genomic sequences. In some cases, annealing temperatures were later adjusted to 52°C,  
603 60°C, or 61°C, to obtain stronger product or to eliminate background bands.

604 Genomic fragments were amplified using OneTaq polymerase (NEB #M0480) or Q5  
605 polymerase (NEB #M0491). Genotyping assays described below used OneTaq, unless otherwise  
606 specified. OneTaq reactions consisted of 1X OneTaq Standard Reaction Buffer, 200 μM dNTPs,  
607 0.2 μM of each primer, and 0.025 U/μl OneTaq polymerase. OneTaq thermocycling conditions  
608 were as follows: 94°C for 2 min; 30-35 cycles of 94°C for 30 sec, 52-61°C for 30 sec, and 68°C  
609 for 1-4 min; and 68°C for 5 min. Q5 reactions consisted of 1X Q5 Reaction Buffer, 200 μM dNTPs,  
610 0.5 μM of each primer, and 0.02 U/μl Q5 polymerase. Q5 thermocycling conditions were as  
611 follows: 98°C for 30 sec; 30-35 cycles of 98°C for 10 sec, 58-61°C for 15 sec, and 72°C for 1.5-3  
612 min; and 72°C for 5 min. Reactions used 10-100 ng template DNA per 20 μl volume.

## 613 Sanger sequencing

614 PCR products were purified for Sanger sequencing using magnetic beads or gel  
615 extraction. For magnetic-bead purification, PCR reactions were mixed with three volumes of  
616 magnetic-bead mixture (10 mM Tris-HCl pH 8.0, 1 mM EDTA, 1.6-2.5 M NaCl, 0.2% Tween-20,  
617 11-20% polyethylene glycol, 0.04% washed SpeedBeads [Sigma #GE45152105050250]), and  
618 agitated for 5 min. Beads were separated from supernatant using a magnet, washed twice in 0.2  
619 ml 80% ethanol for >30 sec, and air-dried for 30 sec. PCR products were eluted from beads in 10  
620 mM Tris-HCl pH 8.0 for >3 min at 65°C. Gel extraction was performed using QIAquick Gel  
621 Extraction Kit (Qiagen #28704), according to the manufacturer guidelines. Sanger sequencing  
622 was performed by Eton Bioscience Inc (etonbio.com).

## 623 Sequencing of coding regions and comparison to Burmese 624 python

625 Coding regions of melanogenesis genes were amplified and sequenced using primers  
626 given in S3 Table. Chromatograms were trimmed using SnapGene Viewer  
627 (snapgene.com/snapgene-viewer) and aligned to one another or to genomic sequences from  
628 Burmese python using ApE (jorgensen.biology.utah.edu/wayned/ape). Alignments were  
629 examined manually to identify divergent and polymorphic sites. Sequence identity between ball  
630 python and Burmese python was calculated across alignable sequence, excluding indels.

## 631 Association study genotyping

632 Variants for the association study were identified through amplification and pilot  
633 sequencing of genomic fragments from five animals (four Non-Albinos and one Albino). For *TYR*,  
634 *TYRP1*, and *TYRP2*, we identified one or more genomic fragments containing multiple  
635 polymorphic sites within the same amplicon. These genomic fragments were selected for the  
636 association study. For *OCA2*, we did not identify any genomic fragments containing multiple  
637 polymorphic sites; we therefore selected two genomic fragments each containing a single  
638 polymorphic site. Divergence between the Albino animal and the other four animals was not a  
639 criterion for inclusion of variants in the association study. Variants were genotyped by amplifying  
640 and sequencing genomic fragments containing the variants. Locations of variants and primers  
641 used for amplifying and sequencing variants are given in S1 Table. Genotypes are provided in S6  
642 Table.

## 643 Haplotype reconstruction

644 Haplotypes were reconstructed using PHASE version 2.1 [91,92]. Parameters were set to  
645 200 iterations, a thinning interval of 2, and a burn-in parameter of 100. These settings produced  
646 identical or nearly identical output for seven runs seeded with different random numbers; thus,  
647 these settings met the criteria for effective choice of parameter settings, according to the PHASE  
648 documentation). The case-control permutation test was performed by comparing Albinos to Non-  
649 Albinos.

## 650 Genotyping assays for *TYR*

651 *TYR* missense variants *D394G* and *P384L* were genotyped by amplifying and sequencing  
652 a genomic fragment containing *TYR* coding region 3. This fragment was amplified using primers  
653 13F (5'-ACT TTC AGG TGG GCA GCA G-3') and 13R (5'-GCT GAC AAC TAA AAT CTC TGC  
654 AA-3') and an annealing temperature of 52°C. The amplicon was sequenced using primer 13F.  
655 Genotypes are provided in S6 Table.

656 *TYR* promoter and intronic regions are amplified using primers given in S4 Table.  
657 Promoter fragments were sequenced in full, and intronic fragments were sequenced from one  
658 end, to confirm that the correct region of the genome had been amplified. Sequencing primers  
659 are given in S4 Table. Size differences among intronic fragments were assessed by separating  
660 fragments on a 1.25% agarose gel. Gels were run long enough for the shortest ladder band (100  
661 bp) to migrate ~8 cm from its starting position.

662 Allele sizes of the variable number tandem repeat (VNTR) in *TYR* were genotyped by  
663 amplifying a genomic fragment located in *TYR* intron 3, using primers 214F (5'-TCT CAC CTG  
664 ATG GCA CAT TC-3') and 209R (5'-GTG CCC ACC CTG ATG TTA TT-3') and an annealing  
665 temperature of 60°C. Amplicon sizes were analyzed as for intronic fragments, described above.

## 666 **Genotyping assays for *OCA2***

667 The *OCA2* deletion was initially identified by amplifying and sequencing a genomic  
668 fragment spanning *OCA2* coding region 18. This fragment was amplified using primers 218F (5'-  
669 ACC CCG TAG CCT CTT CAA AT-3') and 166R (5'-TGG GTG GCA AAC AAT CAT AA-3'), an  
670 annealing temperature of 60°C, and Q5 polymerase. Amplicons were sequenced using both  
671 primers.

672 The *OCA2* deletion was genotyped after its initial identification using a three-primer PCR  
673 assay. This assay used one forward primer and two reverse primers. The forward primer and  
674 one of the reverse primers were located outside the deletion: 217F (5'-GGA GAG AGA ATC CAA  
675 CCC TTG -3') and 166R (5'-TGG GTG GCA AAC AAT CAT AA-3'). The second reverse primer  
676 was located within the deletion: 188R (5'-CAA AGA CCA TTG TCC ATT TCC-3'). The annealing  
677 temperature was 57°C. This assay produces a 429-bp product for the wildtype allele and a 349-  
678 bp product for the deletion allele. Heterozygotes produce both products. Genotypes are provided  
679 in S6 Table.

## 680 **Genotyping assays for *TYRP1***

681 *TYRP1* missense variant *R305H* was genotyped by amplifying and sequencing a genomic  
682 fragment spanning *TYRP1* coding region 4. This fragment was amplified using primers 18F (5'-  
683 GCT CTT TTC TCT AAG TCT GAC CTC -3') and 18R (5'-TCT TGT CCC ACA AAA GGA TTT -  
684 3') and an annealing temperature of 57°C. The amplicon was sequenced using primer 18F.

685 The putative deletion of *TYRP1* coding regions 6 and 7 was identified using primers given  
686 in S5 Table. The putative deletion was genotyped after its initial identification by amplifying a  
687 genomic fragment of *TYRP1* spanning coding regions 6 and 7. This fragment was amplified using  
688 primers 20F (5'-GCA TTG TTT TAT CAG CCA TGA A-3') and 21R (5'-GGA ATT GAG ACA AAT  
689 CCT TGG-3') and an annealing temperature of 57°C. Genotypes are provided in S6 Table.

## 690 **Protein sequence alignment**

691 Protein sequences were aligned using Clustal Omega [110], using default parameters.

## 692 Acknowledgements

693 We thank Matt Rockman and Katy Greenwald for advice on haplotype reconstruction; Bob  
694 Winning, Anne Casper, David Kass, and two anonymous reviewers for comments on the  
695 manuscript; and the Educational Course Support program of New England BioLabs for reagents  
696 used in undergraduate teaching labs. We thank the following individuals for contributing ball  
697 python sheds: Adam and Nicole Schmid; Alycia Butler; Amanda Hall; Andelyn Czajka; Brad Carter  
698 of Driftless Reptiles; Bryan Rivera; Chiron Graves; Chun Ku of Dynasty Reptiles; Dale Porcher;  
699 Daniel Ross; David Wolf of Tornado Alley Reptiles; David Burstein; Dawn and Kelsi Greene of  
700 Super Natural Balls; Dayna Plehn; Debby Brauer; Epic Vibrant Balls; Eric Chung of Chung  
701 Reptiles; Erin Burt; George Straub; Haily McCullough; Jaden Christensen; Jake Lewis; Jamie  
702 Palazzo of New Day Reptiles; Jeff Kearns; Jeff Linton; Jodi Wilkowski; Joe Myers; John Cordone  
703 of Blue Water Reptiles; Jordan Noland; Justin Kobylka of J. Kobylka Reptiles; Lindsay VanOrman;  
704 Lisa Huis; Manuel San Juan; Mark Bilger; Lynnet Melton; Maryann Barbon; Mia Hynes; Michael,  
705 Lisa, and Bodie Cole of Ballroom Pythons South; Morgan Evans and Michael Kitto of MK Pythons;  
706 Morgan Shelton; Paul and Amber Fiorito of Vivid Scales; Pets 'n' Things of Saline, MI; Rachel  
707 Voyt; Royal Black Balls; Ryan Boyd and Brittney Delacruz; Ryan Young of Molecular Reptile;  
708 Sergio McDole; Stephanie S. Crisp; Steve P. of Prime Pets; Zac Parpart; and several anonymous  
709 contributors. We thank the following individuals for providing images of color morphs: Beth  
710 Woodyard; Cat Church; Cormier Jason; Christine Miller; Darin Taylor; Daniel Hatcher; David C.  
711 Callahan; Donald Grinstead; Elijah Snyder; Innovative Ectotherms; Jake Lewis; Jessica Allison;  
712 Jessica Van Riper; Justin Kobylka; James Thompson; Justin Revington; Mariette van Vuuren;  
713 Mark Hopkins; Mark Smith; Matthew Lopez; Michael Freedman of The Florida Reptile Ranch;  
714 Morgan Evans; Phil Barclay, Robert Cooper; Ron Heisenberg; Ryan Young; Selectively Bred  
715 Serpents; Seb Des Légendes Celtiques; and Thananan Jivaramonaikul.

716 Most of the data in this study were collected by undergraduates enrolled in a laboratory  
717 course at Eastern Michigan University. These students constitute the BIO306W Consortium.  
718 These students were Alexandra Ernst, Alia Frederick, Alissa Zoltowski, Amber Northcutt, Andraya  
719 Ackerman, Anna Pathammavong, Annette Miller, Ashly Matzek, Asra Akhlaq, Aubrey Martin,  
720 Bailey Knight, Benjamin Huff, Beth Wasserman, Brian Donald Condron, Caleb Sommer,  
721 Cassandra Rigor, Charles Southwell, Chase Chitwood, Chelsea Brown, Christina Roka, Ciarra  
722 Womack, Clay McKenzie, Daniela Nappo, Darby Fracassa, Deirdre McCarter, Dhruvalkumar  
723 Patel, Dominic Paoletti, Drake Dzierwa, Erica R. Geml, Erin Bissett, Ezekiel Butcher, Garrett  
724 Chance, Garry Lewis, Genesis Garmendia, Geo Pullockaran, Hajer Musa Abuzir, Haley Praski,  
725 Hanan Alroaini, Iqra Akhlaq, Ismael Yasin, Janelle Aethyr, Janelle Janisse, Jayce Alee Perysian,  
726 Jemar Rooks, Jonathan Chang, Jonathan Harris, Joseph H. Oberlitner, Joshua Mason, Juwan  
727 Taylor, Kailynn Sparks, Karissa Urban, Karli Siefman, Kealy Szymanski, Kelsy Roque, Keyan  
728 Marshall, Khaled Ali, Karleigh Hassenzahl, Kylie Powrie, Lauren Colone, Lissette Rosas, Manoj  
729 Perumallapalli, Mariam Samir, Maryam Nimer, Maya Mackey, Megan McNulty, Mel Roberts,  
730 Micaela Schempf, Molly Cook, Myah Kelly, Nahiel Sukar, Natalie Diaz, Natasha MacKay, Nathan  
731 Barnett, Nathaniel Gonzalez, Noura Taybeh, Pablo De la Vega, Rida Ali, Ronnie Bryans, Ryan  
732 Elliott, Saja Hussein, Samantha Glowacki, Samuel Teener, Sarah Holtzen, Sarah Schmidt, Shanti  
733 Bernstein, Shelan Mizuree, Smarpita Singh, Stevie Zabrosky, Taia Broadbent, Tommiea  
734 Robertson, Tyler Schallhorn, Verginio Persicone, William Soder, Wolfgang Ebersole, and Yvette  
735 Campbell.

## 736 **References**

- 737 1. Cuthill IC, Allen WL, Arbuckle K, Caspers B, Chaplin G, Hauber ME, et al. The biology of  
738 color. *Science*. 2017;357: eaan0221. doi:10.1126/science.aan0221
- 739 2. Cieslak M, Reissmann M, Hofreiter M, Ludwig A. Colours of domestication. *Biol Rev*.  
740 2011;86: 885–899. doi:10.1111/j.1469-185X.2011.00177.x
- 741 3. Toews DPL, Hofmeister NR, Taylor SA. The Evolution and Genetics of Carotenoid  
742 Processing in Animals. *Trends Genet*. 2017;33: 171–182. doi:10.1016/j.tig.2017.01.002
- 743 4. Prum RO. *Anatomy, physics, and evolution of avian structural colors. Bird Coloration.*  
744 Cambridge, MA: Harvard University Press; 2006.
- 745 5. Ghiradella H. Structure and Development of Iridescent Lepidopteran Scales - the  
746 Papilionidae as a Showcase Family. *Ann Entomol Soc Am*. 1985;78: 252–264.  
747 doi:10.1093/aesa/78.2.252
- 748 6. Bagnara JT, Taylor JD, Hadley ME. The dermal chromatophore unit. *J Cell Biol*. 1968;38:  
749 67–79. doi:10.1083/jcb.38.1.67
- 750 7. Saenko SV, Teyssier J, van der Marel D, Milinkovitch MC. Precise colocalization of  
751 interacting structural and pigmentary elements generates extensive color pattern variation  
752 in *Phelsuma* lizards. *BMC Biol*. 2013;11: 105. doi:10.1186/1741-7007-11-105
- 753 8. Kinoshita S, Yoshioka S. Structural colors in nature: The role of regularity and irregularity  
754 in the structure. *ChemPhysChem*. 2005;6: 1442–1459. doi:10.1002/cphc.200500007
- 755 9. Slominski A, Tobin DJ, Shibahara S, Wortsman J. Melanin pigmentation in mammalian skin  
756 and its hormonal regulation. *Physiol Rev*. 2004;84: 1155–1228.  
757 doi:10.1152/physrev.00044.2003
- 758 10. Meredith P, Sarna T. The physical and chemical properties of eumelanin. *Pigm Cell Res*.  
759 2006;19: 572–594. doi:10.1111/j.1600-0749.2006.00345.x
- 760 11. Bagnara JT, Fernandez PJ, Fujii R. On the blue coloration of vertebrates. *Pigm Cell Res*.  
761 2007;20: 14–26. doi:10.1111/j.1600-0749.2006.00360.x
- 762 12. Olsson M, Stuart-Fox D, Ballen C. Genetics and evolution of colour patterns in reptiles.  
763 *Semin Cell Dev Biol*. 2013;24: 529–541. doi:10.1016/j.semcd.2013.04.001
- 764 13. Shawkey MD, D’Alba L. Interactions between colour-producing mechanisms and their  
765 effects on the integumentary colour palette. *Philos Trans R Soc B-Biol Sci*. 2017;372:  
766 20160536. doi:10.1098/rstb.2016.0536
- 767 14. Bagnara JT, Matsumoto J. *Comparative Anatomy and Physiology of Pigment Cells in*  
768 *Nonmammalian Tissues. The Pigmentary System.* John Wiley & Sons, Ltd; 2006. pp. 11–  
769 59. doi:10.1002/9780470987100.ch2
- 770 15. Singh AP, Nuesslein-Volhard C. Zebrafish Stripes as a Model for Vertebrate Colour Pattern  
771 Formation. *Curr Biol*. 2015;25: R81–R92. doi:10.1016/j.cub.2014.11.013

- 772 16. Huang D, Lewis VM, Foster TN, Toomey MB, Corbo JC, Parichy DM. Development and  
773 genetics of red coloration in the zebrafish relative *Danio albolineatus*. *eLife*. 2021;10:  
774 e70253. doi:10.7554/eLife.70253
- 775 17. Kimura T, Nagao Y, Hashimoto H, Yamamoto-Shiraishi Y, Yamamoto S, Yabe T, et al.  
776 Leucophores are similar to xanthophores in their specification and differentiation processes  
777 in medaka. *Proc Natl Acad Sci U S A*. 2014;111: 7343–7348.  
778 doi:10.1073/pnas.1311254111
- 779 18. Nusslein-Volhard C, Singh AP. How fish color their skin: A paradigm for development and  
780 evolution of adult patterns Multipotency, plasticity, and cell competition regulate  
781 proliferation and spreading of pigment cells in Zebrafish coloration. *Bioessays*. 2017;39:  
782 1600231. doi:10.1002/bies.201600231
- 783 19. Cooke TF, Fischer CR, Wu P, Jiang T-X, Xie KT, Kuo J, et al. Genetic Mapping and  
784 Biochemical Basis of Yellow Feather Pigmentation in Budgerigars. *Cell*. 2017;171: 427-+.  
785 doi:10.1016/j.cell.2017.08.016
- 786 20. Gazda MA, Araujo PM, Lopes RJ, Toomey MB, Andrade P, Afonso S, et al. A genetic  
787 mechanism for sexual dichromatism in birds. *Science*. 2020;368: 1270-+.  
788 doi:10.1126/science.aba0803
- 789 21. Kwon YM, Vranken N, Hoge C, Lichak MR, Francis KX, Camacho-Garcia J, et al. Genomic  
790 consequences of domestication of the Siamese fighting fish. 2021 Apr p.  
791 2021.04.29.442030. doi:10.1101/2021.04.29.442030
- 792 22. Lopes RJ, Johnson JD, Toomey MB, Ferreira MS, Araujo PM, Melo-Ferreira J, et al.  
793 Genetic Basis for Red Coloration in Birds. *Curr Biol*. 2016;26: 1427–1434.  
794 doi:10.1016/j.cub.2016.03.076
- 795 23. Mundy NI, Stapley J, Bennison C, Tucker R, Twyman H, Kim K-W, et al. Red Carotenoid  
796 Coloration in the Zebra Finch Is Controlled by a Cytochrome P450 Gene Cluster. *Curr Biol*.  
797 2016;26: 1435–1440. doi:10.1016/j.cub.2016.04.047
- 798 24. Toomey MB, Lopes RJ, Araujo PM, Johnson JD, Gazda MA, Afonso S, et al. High-density  
799 lipoprotein receptor SCARB1 is required for carotenoid coloration in birds. *Proc Natl Acad  
800 Sci U S A*. 2017;114: 5219–5224. doi:10.1073/pnas.1700751114
- 801 25. Zhang W, Wang H, Brandt DYC, Hu B, Sheng J, Wang M, et al. The genetic architecture  
802 of phenotypic diversity in the betta fish (*Betta splendens*). *bioRxiv*. 2021;  
803 2021.05.10.443352. doi:10.1101/2021.05.10.443352
- 804 26. Garcia-Elfring A, Roffey HL, Hendry AP, Barrett RDH. A nonsense mutation in TFEC is the  
805 likely cause of the recessive piebald phenotype in ball pythons (*Python regius*). 2020 Nov  
806 p. 2020.10.30.362970. doi:10.1101/2020.10.30.362970
- 807 27. Guo L, Bloom J, Sykes S, Huang E, Kashif Z, Pham E, et al. Genetics of white color and  
808 iridophoroma in “Lemon Frost” leopard geckos. *PLoS Genet*. 2021;17: e1009580.  
809 doi:10.1371/journal.pgen.1009580



- 810 28. McLean CA, Lutz A, Rankin KJ, Stuart-Fox D, Moussalli A. Revealing the Biochemical and  
811 Genetic Basis of Color Variation in a Polymorphic Lizard. *Mol Biol Evol.* 2017;34: 1924–  
812 1935. doi:10.1093/molbev/msx136
- 813 29. Ullate-Agote A, Burgelin I, Debry A, Langrez C, Montange F, Peraldi R, et al. Genome  
814 mapping of a LYST mutation in corn snakes indicates that vertebrate chromatophore  
815 vesicles are lysosome-related organelles. *Proc Natl Acad Sci U S A.* 2020;117: 26307–  
816 26317. doi:10.1073/pnas.2003724117
- 817 30. Bale R. Ball python exports raise concerns as demand for the popular pet grows. *National*  
818 *Geographic.* 2020.
- 819 31. Broghammer S. Python regius: Atlas of Colour Morphs Keeping and Breeding. NTV Natur  
820 und Tier-Verlag; 2019.
- 821 32. Irizarry KJL, Bryden RL. In Silico Analysis of Gene Expression Network Components  
822 Underlying Pigmentation Phenotypes in the Python Identified Evolutionarily Conserved  
823 Clusters of Transcription Factor Binding Sites. *Adv Bioinformatics.* 2016;2016: 1286510.  
824 doi:10.1155/2016/1286510
- 825 33. McCurley K. Complete Ball Python, A Comprehensive Guide to Care, Breeding, and  
826 Genetic Mutations: Kevin McCurley: 9780976733409: Amazon.com: Books. *ECO /*  
827 *Serpent's Tale NHBD*; 2005.
- 828 34. Burbrink FT, Castoe TA. Molecular Phylogeography of Snakes. *Snakes: Ecology and*  
829 *Conservation.* Cornell University Press; 2011. pp. 38–77. doi:10.7591/9780801459092-006
- 830 35. Liu Q, Qi Y, Liang Q, Song J, Liu J, Li W, et al. Targeted disruption of tyrosinase causes  
831 melanin reduction in *Carassius auratus cuvieri* and its hybrid progeny. *Sci China-Life Sci.*  
832 2019;62: 1194–1202. doi:10.1007/s11427-018-9404-7
- 833 36. Koga A, Wakamatsu Y, Kurosawa J, Hori H. Oculocutaneous albinism in the i(6) mutant of  
834 the medaka fish is associated with a deletion in the tyrosinase gene. *Pigm Cell Res.*  
835 1999;12: 252–258. doi:10.1111/j.1600-0749.1999.tb00758.x
- 836 37. Miura I, Tagami M, Fujitani T, Ogata M. Spontaneous tyrosinase mutations identified in  
837 albinos of three wild frog species. *Genes Genet Syst.* 2017;92: 189–196.  
838 doi:10.1266/ggs.16-00061
- 839 38. Iwanishi S, Zaitzu S, Shibata H, Nitasaka E. An albino mutant of the Japanese rat snake  
840 (*Elaphe climacophora*) carries a nonsense mutation in the tyrosinase gene. *Genes Genet*  
841 *Syst.* 2018;93: 163–167. doi:10.1266/ggs.18-00021
- 842 39. Tobita-Teramoto T, Jang GY, Kino K, Salter DW, Brumbaugh J, Akiyama T. Autosomal  
843 albino chicken mutation (ca/ca) deletes hexanucleotide (-deltaGACTGG817) at a copper-  
844 binding site of the tyrosinase gene. *Poult Sci.* 2000;79: 46–50. doi:10.1093/ps/79.1.46
- 845 40. Chang C-M, Coville J-L, Coquerelle G, Gourichon D, Oulmouden A, Tixier-Boichard M.  
846 Complete association between a retroviral insertion in the tyrosinase gene and the  
847 recessive white mutation in chickens. *BMC Genomics.* 2006;7: 19. doi:10.1186/1471-2164-  
848 7-19

- 849 41. Chang CM, Furet JP, Coville JL, Coquerelle G, Gourichon D, Tixier-Boichard M.  
850 Quantitative effects of an intronic retroviral insertion on the transcription of the tyrosinase  
851 gene in recessive white chickens. *Anim Genet.* 2007;38: 162–167. doi:10.1111/j.1365-  
852 2052.2007.01581.x
- 853 42. Florisbal Dame MC, Xavier GM, Oliveira-Filho JP, Borges AS, Oliveira HN, Riet-Correa F,  
854 et al. A nonsense mutation in the tyrosinase gene causes albinism in water buffalo. *BMC*  
855 *Genet.* 2012;13: 62. doi:10.1186/1471-2156-13-62
- 856 43. Schmutz SM, Berryere TG, Ciobanu DC, Mileham AJ, Schmitz BH, Fredholm M. A form  
857 of albinism in cattle is caused by a tyrosinase frameshift mutation. *Mamm Genome.*  
858 2004;15: 62–67. doi:10.1007/s00335-002-2249-5
- 859 44. Reiner G, Tramberend K, Nietfeld F, Volmer K, Wurmser C, Fries R, et al. A genome-wide  
860 scan study identifies a single nucleotide substitution in the tyrosinase gene associated with  
861 white coat colour in a red deer (*Cervus elaphus*) population. *BMC Genet.* 2020;21.  
862 doi:10.1186/s12863-020-0814-0
- 863 45. Utzeri VJ, Bertolini F, Ribani A, Schiavo G, Dall'Olio S, Fontanesi L. The albinism of the  
864 feral Asinara white donkeys (*Equus asinus*) is determined by a missense mutation in a  
865 highly conserved position of the tyrosinase (TYR) gene deduced protein. *Anim Genet.*  
866 2016;47: 120–124. doi:10.1111/age.12386
- 867 46. Yokoyama T, Silversides D, Waymire K, Kwon B, Takeuchi T, Overbeek P. Conserved  
868 Cysteine to Serine Mutation in Tyrosinase Is Responsible for the Classical Albino Mutation  
869 in Laboratory Mice. *Nucleic Acids Res.* 1990;18: 7293–7298. doi:10.1093/nar/18.24.7293
- 870 47. Blaszczyk WM, Arning L, Hoffmann KP, Epplen JT. A Tyrosinase missense mutation  
871 causes albinism in the Wistar rat. *Pigm Cell Res.* 2005;18: 144–145. doi:10.1111/j.1600-  
872 0749.2005.00227.x
- 873 48. Yu F, Jiao S, Lai W, Liu Z, Zhu M, Zhu W, et al. Conserved aspartate-to-glycine mutation  
874 in tyrosinase is associated with albino phenotype in domestic guinea pigs (*Cavia porcellus*).  
875 *Anim Genet.* 2018;49: 354–355. doi:10.1111/age.12683
- 876 49. Kim Y-H, Park S-J, Choe S-H, Lee J-R, Cho H-M, Kim S-U, et al. Identification and  
877 characterization of the tyrosinase gene (TYR) and its transcript variants (TYR\_1 and  
878 TYR\_2) in the crab-eating macaque (*Macaca fascicularis*). *Gene.* 2017;630: 21–27.  
879 doi:10.1016/j.gene.2017.07.047
- 880 50. Galante Rocha de Vasconcelos FT, Hauzman E, Henriques LD, Kilpp Goulart PR, Galvao  
881 O de F, Sano RY, et al. A novel nonsense mutation in the tyrosinase gene is related to the  
882 albinism in a capuchin monkey (*Sapajus apella*). *BMC Genet.* 2017;18: 39.  
883 doi:10.1186/s12863-017-0504-8
- 884 51. Koga A, Hisakawa C, Yoshizawa M. Baboon bearing resemblance in pigmentation pattern  
885 to Siamese cat carries a missense mutation in the tyrosinase gene. *Genome.* 2020;63.  
886 doi:10.1139/gen-2020-0003

- 887 52. Montoliu L, Gronskov K, Wei A-H, Martinez-Garcia M, Fernandez A, Arveiler B, et al.  
888 Increasing the complexity: new genes and new types of albinism. *Pigment Cell Melanoma*  
889 *Res.* 2014;27. doi:10.1111/pcmr.12167
- 890 53. Polanowski AM, Robinson-Laverick SM, Paton D, Jarman SN. Variation in the Tyrosinase  
891 Gene Associated with a White Humpback Whale (*Megaptera novaeangliae*). *J Hered.*  
892 2012;103: 130–133. doi:10.1093/jhered/esr108
- 893 54. Blaszczyk WM, Distler C, Dekomien G, Arning L, Hoffmann K-P, Eppelen JT. Identification  
894 of a tyrosinase (TYR) exon 4 deletion in albino ferrets (*Mustela putorius furo*). *Anim Genet.*  
895 2007;38: 421–423. doi:10.1111/j.1365-2052.2007.01619.x
- 896 55. Anistoroaei R, Fredholm M, Christensen K, Leeb T. Albinism in the American mink  
897 (*Neovison vison*) is associated with a tyrosinase nonsense mutation. *Anim Genet.* 2008;39:  
898 645–648. doi:10.1111/j.1365-2052.2008.01788.x
- 899 56. Imes DL, Geary LA, Grahn RA, Lyons LA. Albinism in the domestic cat (*Felis catus*) is  
900 associated with a tyrosinase (TYR) mutation. *Anim Genet.* 2006;37: 175–178.  
901 doi:10.1111/j.1365-2052.2005.01409.x
- 902 57. Lyons LA, Imes DL, Rah HC, Grahn RA. Tyrosinase mutations associated with Siamese  
903 and Burmese patterns in the domestic cat (*Felis catus*). *Anim Genet.* 2005;36: 119–126.  
904 doi:10.1111/j.1365-2052.2005.01253.x
- 905 58. Schmidt-Kuntzel A, Eizirik E, O'Brien SJ, Menotti-Raymond M. Tyrosinase and tyrosinase  
906 related protein 1 alleles specify domestic cat coat color phenotypes of the albino and brown  
907 loci. *J Hered.* 2005;96: 289–301. doi:10.1093/jhered/esi066
- 908 59. Yan S, Zhao D, Hu M, Tan X, Lai W, Kang J, et al. A single base insertion in the tyrosinase  
909 gene is associated with albino phenotype in silver foxes (*Vulpes vulpes*). *Anim Genet.*  
910 2019;50: 550–550. doi:10.1111/age.12816
- 911 60. Gross JB, Wilkens H. Albinism in phylogenetically and geographically distinct populations  
912 of *Astyanax* cavefish arises through the same loss-of-function *Oca2* allele. *Heredity.*  
913 2013;111: 122–130. doi:10.1038/hdy.2013.26
- 914 61. Kratochwil CF, Urban S, Meyer A. Genome of the Malawi golden cichlid fish  
915 (*Melanochromis auratus*) reveals exon loss of *oca2* in an amelanistic morph. *Pigment Cell*  
916 *Melanoma Res.* 2019;32: 719–723. doi:10.1111/pcmr.12799
- 917 62. Saenko SV, Lamichhaney S, Barrio AM, Rafati N, Andersson L, Milinkovitch MC.  
918 Amelanism in the corn snake is associated with the insertion of an LTR-retrotransposon in  
919 the *OCA2* gene. *Sci Rep.* 2015;5: 17118. doi:10.1038/srep17118
- 920 63. Caduff M, Bauer A, Jagannathan V, Leeb T. *OCA2* splice site variant in German Spitz dogs  
921 with oculocutaneous albinism. *PLoS One.* 2017;12: e0185944.  
922 doi:10.1371/journal.pone.0185944
- 923 64. Zhang Y, Hong Q, Cao C, Yang L, Li Y, Hai T, et al. A novel porcine model reproduces  
924 human oculocutaneous albinism type. *Cell Discov.* 2019;5: 48. doi:10.1038/s41421-019-  
925 0117-7

- 926 65. Shoji H, Kiniwa Y, Okuyama R, Yang M, Higuchi K, Mori M. A nonsense nucleotide  
927 substitution in the oculocutaneous albinism II gene underlies the original pink-eyed dilution  
928 allele (Oca2(p)) in mice. *Exp Anim*. 2015;64: 171–179. doi:10.1538/expanim.14-0075
- 929 66. Krauss J, Geiger-Rudolph S, Koch I, Nuesslein-Volhard C, Irion U. A dominant mutation in  
930 *tyrp1A* leads to melanophore death in zebrafish. *Pigment Cell Melanoma Res*. 2014;27:  
931 827–830. doi:10.1111/pcmr.12272
- 932 67. Cortimiglia C, Castiglioni B, Pizzi F, Stella A, Capra E. Involvement of tyrosinase-related  
933 protein 1 gene in the light brown plumage phenotype of *Falco cherrug*. *Anim Genet*.  
934 2017;48: 125–126. doi:10.1111/age.12506
- 935 68. Ren J, Mao H, Zhang Z, Xiao S, Ding N, Huang L. A 6-bp deletion in the *TYRP1* gene  
936 causes the brown colouration phenotype in Chinese indigenous pigs. *Heredity*. 2011;106:  
937 862–868. doi:10.1038/hdy.2010.129
- 938 69. Wu X, Zhang Y, Shen L, Du J, Luo J, Liu C, et al. A 6-bp deletion in exon 8 and two  
939 mutations in introns of *TYRP1* are associated with blond coat color in Liangshan pigs.  
940 *Gene*. 2016;578: 132–136. doi:10.1016/j.gene.2015.12.011
- 941 70. Lyons LA, Foe IT, Rah HC, Grahn RA. Chocolate coated cats: *TYRP1* mutations for brown  
942 color domestic cats. *Mamm Genome*. 2005;16: 356–366. doi:10.1007/s00335-004-2455-4
- 943 71. Gratten J, Beraldi D, Lowder BV, McRae AF, Visscher PM, Pemberton JM, et al.  
944 Compelling evidence that a single nucleotide substitution in *TYRP1* is responsible for coat-  
945 colour polymorphism in a free-living population of Soay sheep. *Proc R Soc B-Biol Sci*.  
946 2007;274: 619–626. doi:10.1098/rspb.2006.3762
- 947 72. Paris JM, Letko A, Hafliger IM, Ammann P, Flury C, Drogemuller C. Identification of two  
948 *TYRP1* loss-of-function alleles in Valais Red sheep. *Anim Genet*. 2019;50: 778–782.  
949 doi:10.1111/age.12863
- 950 73. Cirera S, Markakis MN, Kristiansen T, Vissenberg K, Fredholm M, Christensen K, et al. A  
951 large insertion in intron 2 of the *TYRP1* gene associated with American Palomino  
952 phenotype in American mink. *Mamm Genome*. 2016;27: 135–143. doi:10.1007/s00335-  
953 016-9620-4
- 954 74. Budd P, Jackson I. Structure of the Mouse Tyrosinase-Related Protein-2 Dopachrome  
955 Tautomerase (*tyrp2/Dct*) Gene and Sequence of 2 Novel Slaty Alleles. *Genomics*. 1995;29:  
956 35–43. doi:10.1006/geno.1995.1212
- 957 75. Jackson I, Chambers D, Tsukamoto K, Copeland N, Gilbert D, Jenkins N, et al. A 2nd  
958 Tyrosinase-Related Protein, *Trp-2*, Maps to and Is Mutated at the Mouse Slaty Locus.  
959 *Embo J*. 1992;11: 527–535. doi:10.1002/j.1460-2075.1992.tb05083.x
- 960 76. Chintala S, Li W, Lamoreux ML, Ito S, Wakamatsu K, Sviderskaya EV, et al. *Slc7a11* gene  
961 controls production of pheomelanin pigment and proliferation of cultured cells. *Proc Natl*  
962 *Acad Sci U S A*. 2005;102: 10964–10969. doi:10.1073/pnas.0502856102

- 963 77. Lamason RL, Mohideen M, Mest JR, Wong AC, Norton HL, Aros MC, et al. SLC24A5, a  
964 putative cation exchanger, affects pigmentation in zebrafish and humans. *Science*.  
965 2005;310: 1782–1786. doi:10.1126/science.1116238
- 966 78. Winkler PA, Gornik KR, Ramsey DT, Dubielzig RR, Venta PJ, Petersen-Jones SM, et al. A  
967 Partial Gene Deletion of SLC45A2 Causes Oculocutaneous Albinism in Doberman  
968 Pinscher Dogs. *PLoS One*. 2014;9: e92127. doi:10.1371/journal.pone.0092127
- 969 79. Mack M, Kowalski E, Grahn R, Bras D, Penedo MCT, Bellone R. Two Variants in SLC24A5  
970 Are Associated with “Tiger-Eye” Iris Pigmentation in Puerto Rican Paso Fino Horses. *G3-  
971 Genes Genomes Genet*. 2017;7: 2799–2806. doi:10.1534/g3.117.043786
- 972 80. Fukamachi S, Shimada A, Shima A. Mutations in the gene encoding B, a novel transporter  
973 protein, reduce melanin content in medaka. *Nature Genet*. 2001;28: 381–385.  
974 doi:10.1038/ng584
- 975 81. Gunnarsson U, Hellstrom AR, Tixier-Boichard M, Minvielle F, Bed’hom B, Ito S, et al.  
976 Mutations in SLC45A2 cause plumage color variation in chicken and Japanese quail.  
977 *Genetics*. 2007;175: 867–877. doi:10.1534/genetics.106.063107
- 978 82. Mariat D, Taourit S, Guerin G. A mutation in the MATP gene causes the cream coat colour  
979 in the horse. *Genet Sel Evol*. 2003;35: 119–133. doi:10.1051/gse:2002039
- 980 83. Newton JM, Cohen-Barak O, Hagiwara N, Gardner JM, Davisson MT, King RA, et al.  
981 Mutations in the human orthologue of the mouse underwhite gene (*uw*) underlie a new form  
982 of oculocutaneous albinism, OCA4. *Am J Hum Genet*. 2001;69: 981–988.  
983 doi:10.1086/324340
- 984 84. Xu X, Dong G-X, Hu X-S, Miao L, Zhang X-L, Zhang D-L, et al. The Genetic Basis of White  
985 Tigers. *Curr Biol*. 2013;23: 1031–1035. doi:10.1016/j.cub.2013.04.054
- 986 85. Prado-Martinez J, Hernando-Herraez I, Lorente-Galdos B, Dabad M, Ramirez O, Baeza-  
987 Delgado C, et al. The genome sequencing of an albino Western lowland gorilla reveals  
988 inbreeding in the wild. *BMC Genomics*. 2013;14: 363. doi:10.1186/1471-2164-14-363
- 989 86. Lai X, Wichers HJ, Soler-Lopez M, Dijkstra BW. Structure and Function of Human  
990 Tyrosinase and Tyrosinase-Related Proteins. *Chem-Eur J*. 2018;24: 47–55.  
991 doi:10.1002/chem.201704410
- 992 87. Bellono NW, Escobar IE, Lefkovith AJ, Marks MS, Oancea E. An intracellular anion channel  
993 critical for pigmentation. *eLife*. 2014;3: e04543. doi:10.7554/eLife.04543
- 994 88. Ginger RS, Askew SE, Ogborne RM, Wilson S, Ferdinando D, Dadd T, et al. SLC24A5  
995 encodes a trans-golgi network protein with potassium-dependent sodium-calcium  
996 exchange activity that regulates human epidermal melanogenesis. *J Biol Chem*. 2008;283:  
997 5486–5495. doi:10.1074/jbc.M707521200
- 998 89. Vitavska O, Wiczorek H. The SLC45 gene family of putative sugar transporters. *Mol Asp  
999 Med*. 2013;34: 655–660. doi:10.1016/j.mam.2012.05.014

- 1000 90. Castoe TA, de Koning APJ, Hall KT, Card DC, Schield DR, Fujita MK, et al. The Burmese  
1001 python genome reveals the molecular basis for extreme adaptation in snakes. *Proc Natl*  
1002 *Acad Sci U S A*. 2013;110: 20645–20650. doi:10.1073/pnas.1314475110
- 1003 91. Stephens M, Scheet P. Accounting for decay of linkage disequilibrium in haplotype  
1004 inference and missing-data imputation. *Am J Hum Genet*. 2005;76: 449–462.  
1005 doi:10.1086/428594
- 1006 92. Stephens M, Smith NJ, Donnelly P. A new statistical method for haplotype reconstruction  
1007 from population data. *Am J Hum Genet*. 2001;68: 978–989. doi:10.1086/319501
- 1008 93. Simeonov DR, Wang X, Wang C, Sergeev Y, Dolinska M, Bower M, et al. DNA Variations  
1009 in Oculocutaneous Albinism: An Updated Mutation List and Current Outstanding Issues in  
1010 Molecular Diagnostics. *Hum Mutat*. 2013;34: 827–835. doi:10.1002/humu.22315
- 1011 94. Gardner J, Nakatsu Y, Gondo Y, Lee S, Lyon M, King R, et al. The Mouse Pink-Eyed  
1012 Dilution Gene - Association with Human Prader-Willi and Angelman Syndromes. *Science*.  
1013 1992;257: 1121–1124. doi:10.1126/science.257.5073.1121
- 1014 95. Ni-Komatsu L, Orlow SJ. Heterologous expression of tyrosinase recapitulates the  
1015 misprocessing and mistrafficking in oculocutaneous albinism type 2: Effects of altering  
1016 intracellular pH and pink-eyed dilution gene expression. *Exp Eye Res*. 2006;82: 519–528.  
1017 doi:10.1016/j.exer.2005.08.013
- 1018 96. Puri N, Gardner JM, Brilliant MH. Aberrant pH of melanosomes in pink-eyed dilution (p)  
1019 mutant melanocytes. *J Invest Dermatol*. 2000;115: 607–613. doi:10.1046/j.1523-  
1020 1747.2000.00108.x
- 1021 97. Lee S, Nicholls R, Bunday S, Laxova R, Musarella M, Spritz R. Mutations of the P-Gene in  
1022 Oculocutaneous Albinism, Ocular Albinism, and Prader-Willi-Syndrome Plus Albinism. *N*  
1023 *Engl J Med*. 1994;330: 529–534. doi:10.1056/NEJM199402243300803
- 1024 98. Sato H, Tamba M, Ishii T, Bannai S. Cloning and expression of a plasma membrane  
1025 cystine/glutamate exchange transporter composed of two distinct proteins. *J Biol Chem*.  
1026 1999;274: 11455–11458. doi:10.1074/jbc.274.17.11455
- 1027 99. Bin B-H, Bhin J, Yang SH, Shin M, Nam Y-J, Choi D-H, et al. Membrane-Associated  
1028 Transporter Protein (MATP) Regulates Melanosomal pH and Influences Tyrosinase  
1029 Activity. *PLoS One*. 2015;10: e0129273. doi:10.1371/journal.pone.0129273
- 1030 100. Sturm R, Osullivan B, Box N, Smith A, Smit S, Puttick E, et al. Chromosomal Structure of  
1031 the Human *Tyrp1* and *Tyrp2* Loci and Comparison of the Tyrosinase-Related Protein Cone  
1032 Family. *Genomics*. 1995;29: 24–34. doi:10.1006/geno.1995.1211
- 1033 101. Gershonibaruch R, Rosenmann A, Droetto S, Holmes S, Tripathi R, Spritz R. Mutations of  
1034 the Tyrosinase Gene in Patients with Oculocutaneous Albinism from Various Ethnic-  
1035 Groups in Israel. *Am J Hum Genet*. 1994;54: 586–594.
- 1036 102. Tripathi RK, Strunk KM, Giebel LB, Weleber RG, Spritz RA. Tyrosinase gene mutations in  
1037 type I (tyrosinase-deficient) oculocutaneous albinism define two clusters of missense  
1038 substitutions. *Am J Med Genet*. 1992;43: 865–871. doi:10.1002/ajmg.1320430523

- 1039 103. Tsai CH, Tsai FJ, Wu JY, Lin SP, Chang JG, Yang CF, et al. Insertion/deletion mutations  
1040 of type I oculocutaneous albinism in chinese patients from Taiwan. *Hum Mutat.* 1999;14:  
1041 542. doi:10.1002/(SICI)1098-1004(199912)14:6<542::AID-HUMU14>3.0.CO;2-3
- 1042 104. ForsheW T, Khaliq S, Tee L, Smith U, Johnson CA, Mehdi SQ, et al. Identification of novel  
1043 TYR and TYRP1 mutations in oculocutaneous albinism. *Clin Genet.* 2005;68: 182–184.  
1044 doi:10.1111/j.1399-0004.2005.00460.x
- 1045 105. Lasseaux E, Plaisant C, Michaud V, Pennamen P, Trimouille A, Gaston L, et al. Molecular  
1046 characterization of a series of 990 index patients with albinism. *Pigment Cell Melanoma*  
1047 *Res.* 2018;31: 466–474. doi:10.1111/pcmr.12688
- 1048 106. Rooryck C, Morice-Picard F, Elcioglu NH, Lacombe D, Taieb A, Arveiler B. Molecular  
1049 diagnosis of oculocutaneous albinism: new mutations in the OCA1-4 genes and practical  
1050 aspects. *Pigment Cell Melanoma Res.* 2008;21: 583–587. doi:10.1111/j.1755-  
1051 148X.2008.00496.x
- 1052 107. Rooryck C, Morice F, Lacombe D, Taieb A, Arveiler B. Genetic basis of oculocutaneous  
1053 albinism. *Expert Review of Dermatology.* 2009;4: 611–622. doi:10.1586/edm.09.53
- 1054 108. Allen WL, Baddeley R, Scott-Samuel NE, Cuthill IC. The evolution and function of pattern  
1055 diversity in snakes. *Behav Ecol.* 2013;24: 1237–1250. doi:10.1093/beheco/art058
- 1056 109. Untergasser A, Cutcutache I, Koressaar T, Ye J, Faircloth BC, Remm M, et al. Primer3-  
1057 new capabilities and interfaces. *Nucleic Acids Res.* 2012;40: e115. doi:10.1093/nar/gks596
- 1058 110. Sievers F, Wilm A, Dineen D, Gibson TJ, Karplus K, Li W, et al. Fast, scalable generation  
1059 of high-quality protein multiple sequence alignments using Clustal Omega. *Mol Syst Biol.*  
1060 2011;7: 539. doi:10.1038/msb.2011.75
- 1061

## 1062 **Supporting information**

1063 **S1 Fig. Raw gel images.** (A) Raw image of the gel displayed in Fig 2. (B) Raw image of the gel  
1064 displayed in Fig 3. (C) Raw image of the gel displayed in Fig 4. Brightness and contrast settings  
1065 have not been adjusted in these images. x, experiment unrelated to the current study.

1066 **S1 Table. Variants used in the Albino association study and primers to genotype these**  
1067 **variants.**

1068 **S2 Table. Conservation of gene structure of melanogenesis genes.**

1069 **S3 Table. Primers to amplify and sequence coding regions of melanogenesis genes.**

1070 **S4 Table. Primers to amplify non-coding regions of *TYR*.**

1071 **S5 Table. Primers to investigate the putative deletion in *TYRP1*.**

1072 **S6 Table. Genotypes.**
